# Supplementary material for: Hyphenation of a EC / OC thermal–optical carbon analyzer to photo-ionization time-of-flight mass spectrometry: an off-line aerosol mass spectrometric approach for characterization of primary and secondary particulate matter
Source: Copernicus journal article supplement (doi:10.5194/amt-8-3337-2015), 2015-08-18
Supplement: Supplementary file 1 [file amt-8-3337-2015-supplement.pdf]

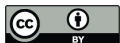

*Supplement of*

**Hyphenation of a EC / OC thermal–optical carbon analyzer to photoionization time-of-flight mass spectrometry: an off-line aerosol mass spectrometric approach for characterization of primary and secondary particulate matter**

**J. Diab et al.**

*Correspondence to:* R. Zimmermann (ralf.zimmermann@uni-rostock.de)

The copyright of individual parts of the supplement might differ from the CC-BY 3.0 licence.

## Supplemental material

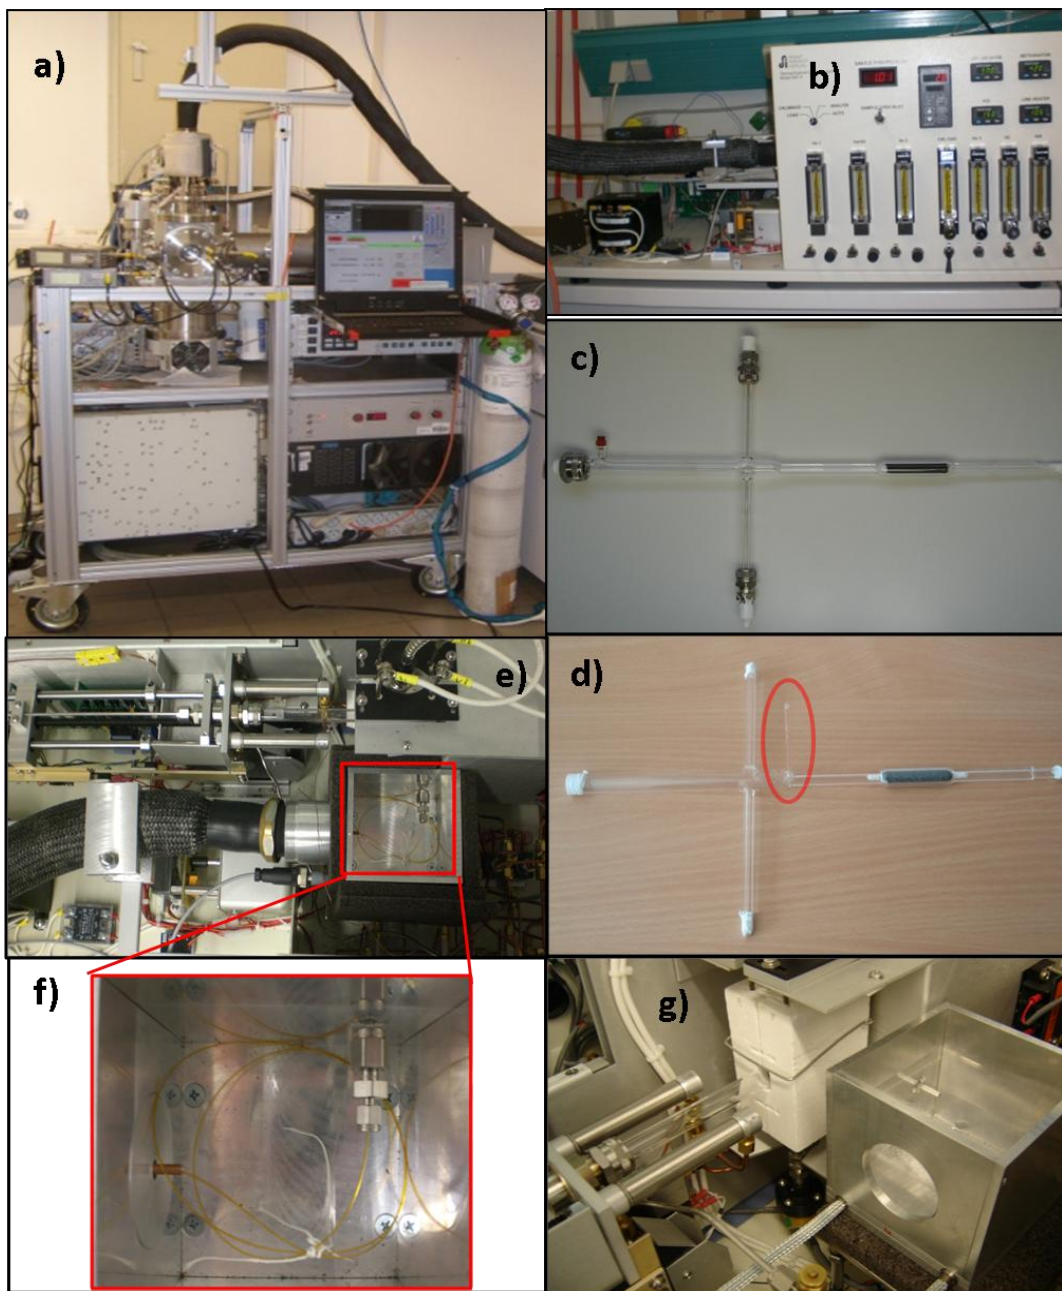

Figure S 1: Pictures of the coupling and assembling (a- PI-TOF-MS, b – carbon analyzer, c - the original quartz tubing system, d – the modified quartz tubing system, e – the whole connecting unit with aluminum box and heating hose, f - zoom into the aluminum box with quartz tube, Swagelok connector and transfer capillary, g - quartz tube reaching into the aluminum box with heating cartridges)

Table S1: Experimental conditions of the chamber experiments

| sample                          | Precursor concentration [ppm] | Ozone concentration [ppm] | Temperature [°C] | chamber volume [m <sup>3</sup> ] | Experiment duration [min] | PM on filter [µg/cm <sup>2</sup> ] |
|---------------------------------|-------------------------------|---------------------------|------------------|----------------------------------|---------------------------|------------------------------------|
| <b>Filter Samples Hong Kong</b> |                               |                           |                  |                                  |                           |                                    |
| α-pinene                        | 500                           | 0.069                     | 23               | 18.26                            | 135                       | 51.8                               |
| β-pinene                        | 200                           | 0.157                     | 23               | 18.26                            | 135                       | 15.2                               |
| Isoprene                        | 100                           | 0.17                      | 23               | 18.26                            | 240                       | 12.9                               |
| <b>Filter samples Karlsruhe</b> |                               |                           |                  |                                  |                           |                                    |
| α-pinene I                      | 2.2                           | 25                        | 22               | 3.7                              | 55                        | n.a.                               |
| α-pinene II                     | 2.215                         | 6                         | 24               | 3.7                              | 30                        | n.a.                               |

Table S2: Carbon contents [µg/filter] of all samples corrected with laser transmittance (with regular split)

| sample             | TC [µg/filter] | OC [µg/filter] | EC [µg/filter] | OC/EC   | OC/TC [%] | EC/TC [%] |
|--------------------|----------------|----------------|----------------|---------|-----------|-----------|
| diesel             | 24.18          | 12.47          | 11.71          | 1.07    | 52        | 48        |
| gasoline           | 33.54          | 8.06           | 25.49          | 0.32    | 24        | 76        |
| wood combustion I  | 130.56         | 122.63         | 7.92           | 15.48   | 94        | 6         |
| wood combustion II | 67.75          | 51.25          | 16.50          | 3.11    | 76        | 24        |
| Ispra winter       | 25.18          | 18.61          | 6.57           | 2.83    | 74        | 26        |
| Ispra summer       | 4.25           | 3.62           | 0.63           | 5.75    | 85        | 15        |
| β-pinene HK        | 3.27           | 3.27           | 0.00           | ∞       | 100       | 0         |
| α-pinene HK        | 12.66          | 12.65          | 0.01           | 1264.50 | 100       | 0         |
| α-pinene KR        | 28.01          | 27.98          | 0.03           | 932.67  | 100       | 0         |
| isoprene HK        | 0.56           | 0.55           | 0.01           | 55.00   | 98        | 2         |

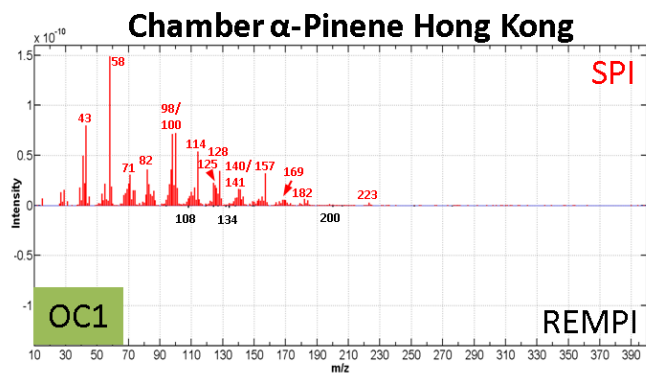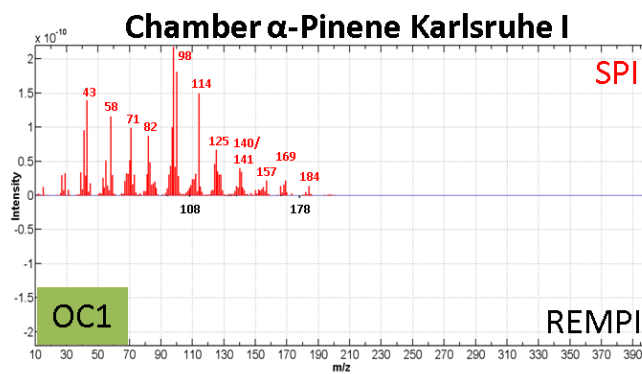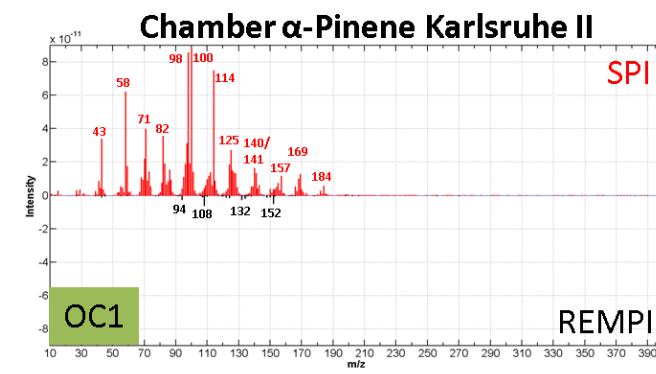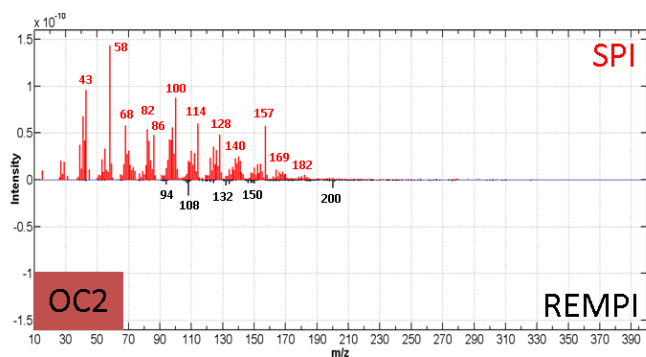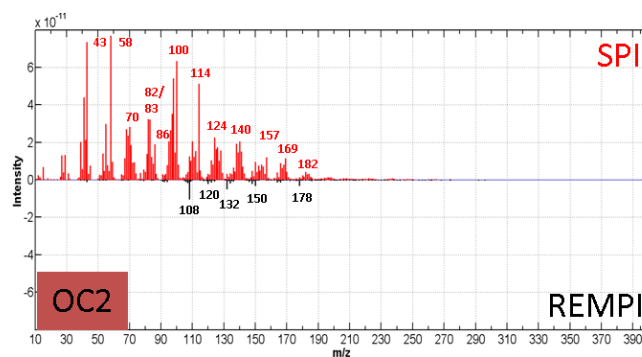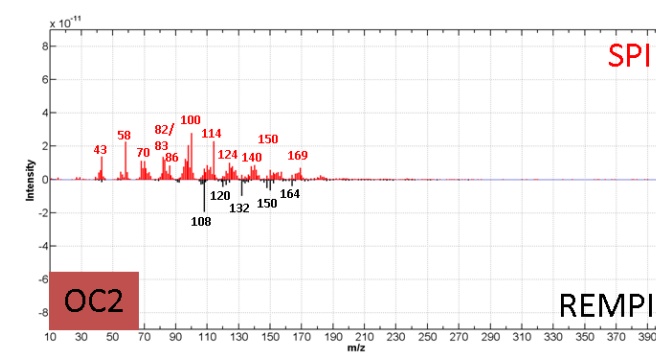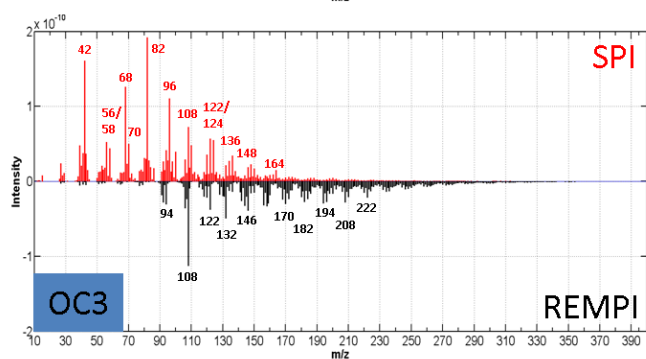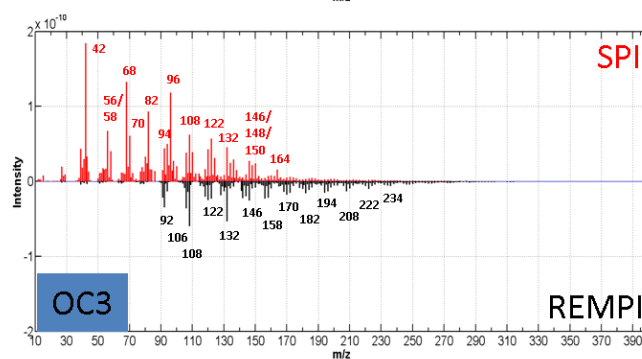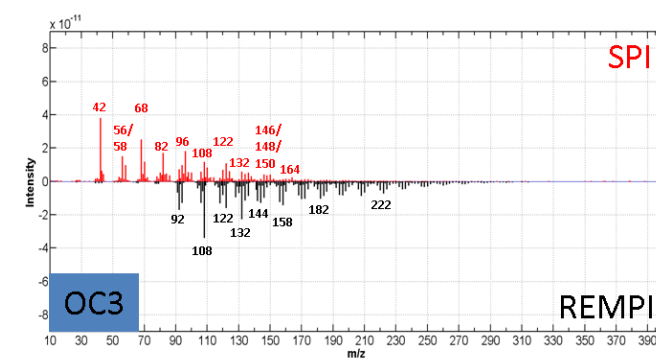

Figure S 2: Comparison of the mass spectra obtained by the measurement of the filter samples from the three different chamber experiments using  $\alpha$ -pinene as a precursor.



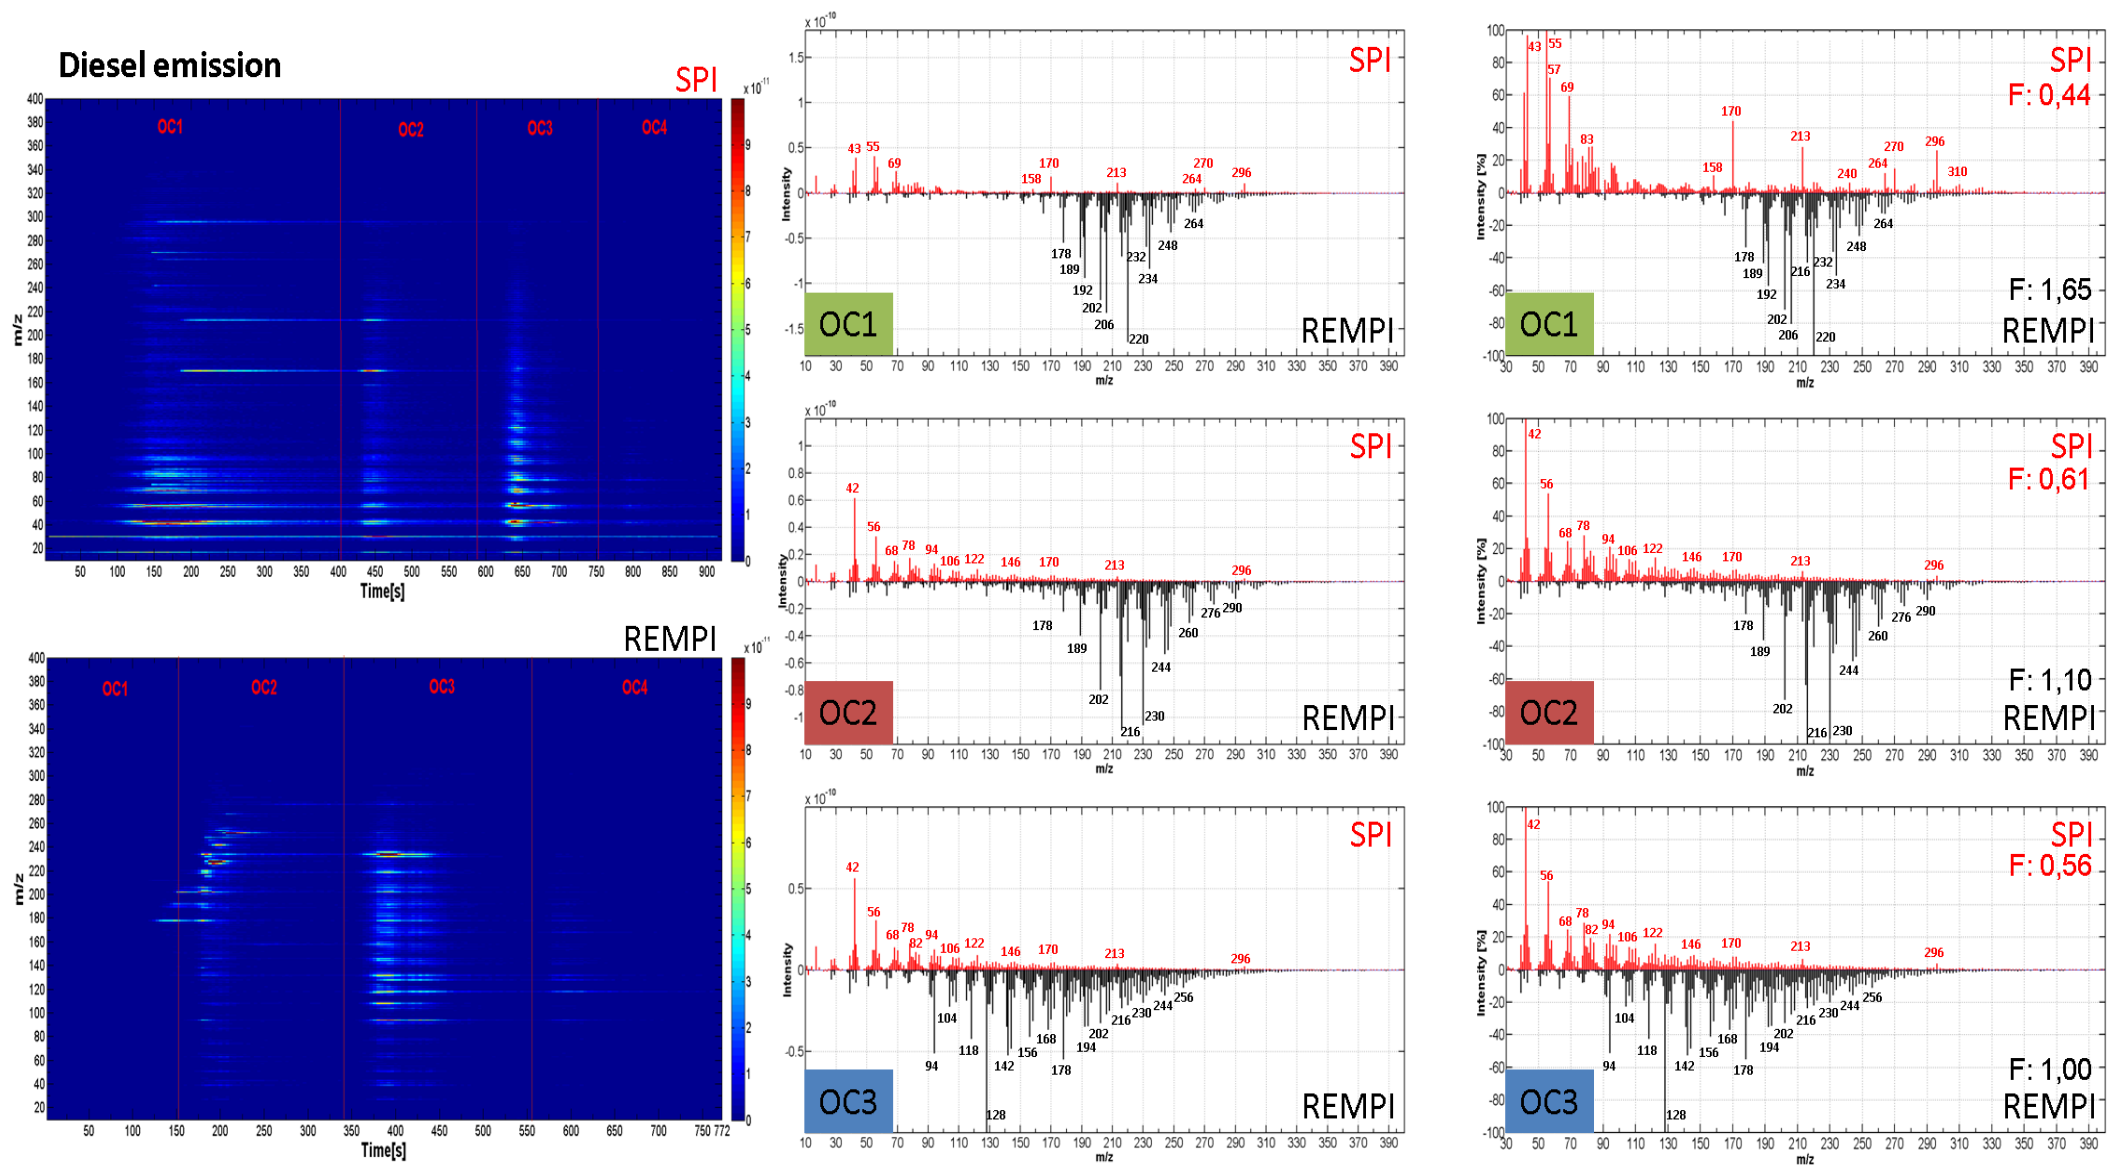

Figure S3: Two-dimensional mass spectrum of the course of signals ( $m/z$ ) over the four OC-steps (left) for SPI (top) and REMPI (bottom), mass spectra for the first three OC-steps (SPI-red, REMPI-black) (middle), mass spectra for the first three OC-steps normalized to 100 % (right) of the diesel emission sample. Measured with the IMPROVE protocol.

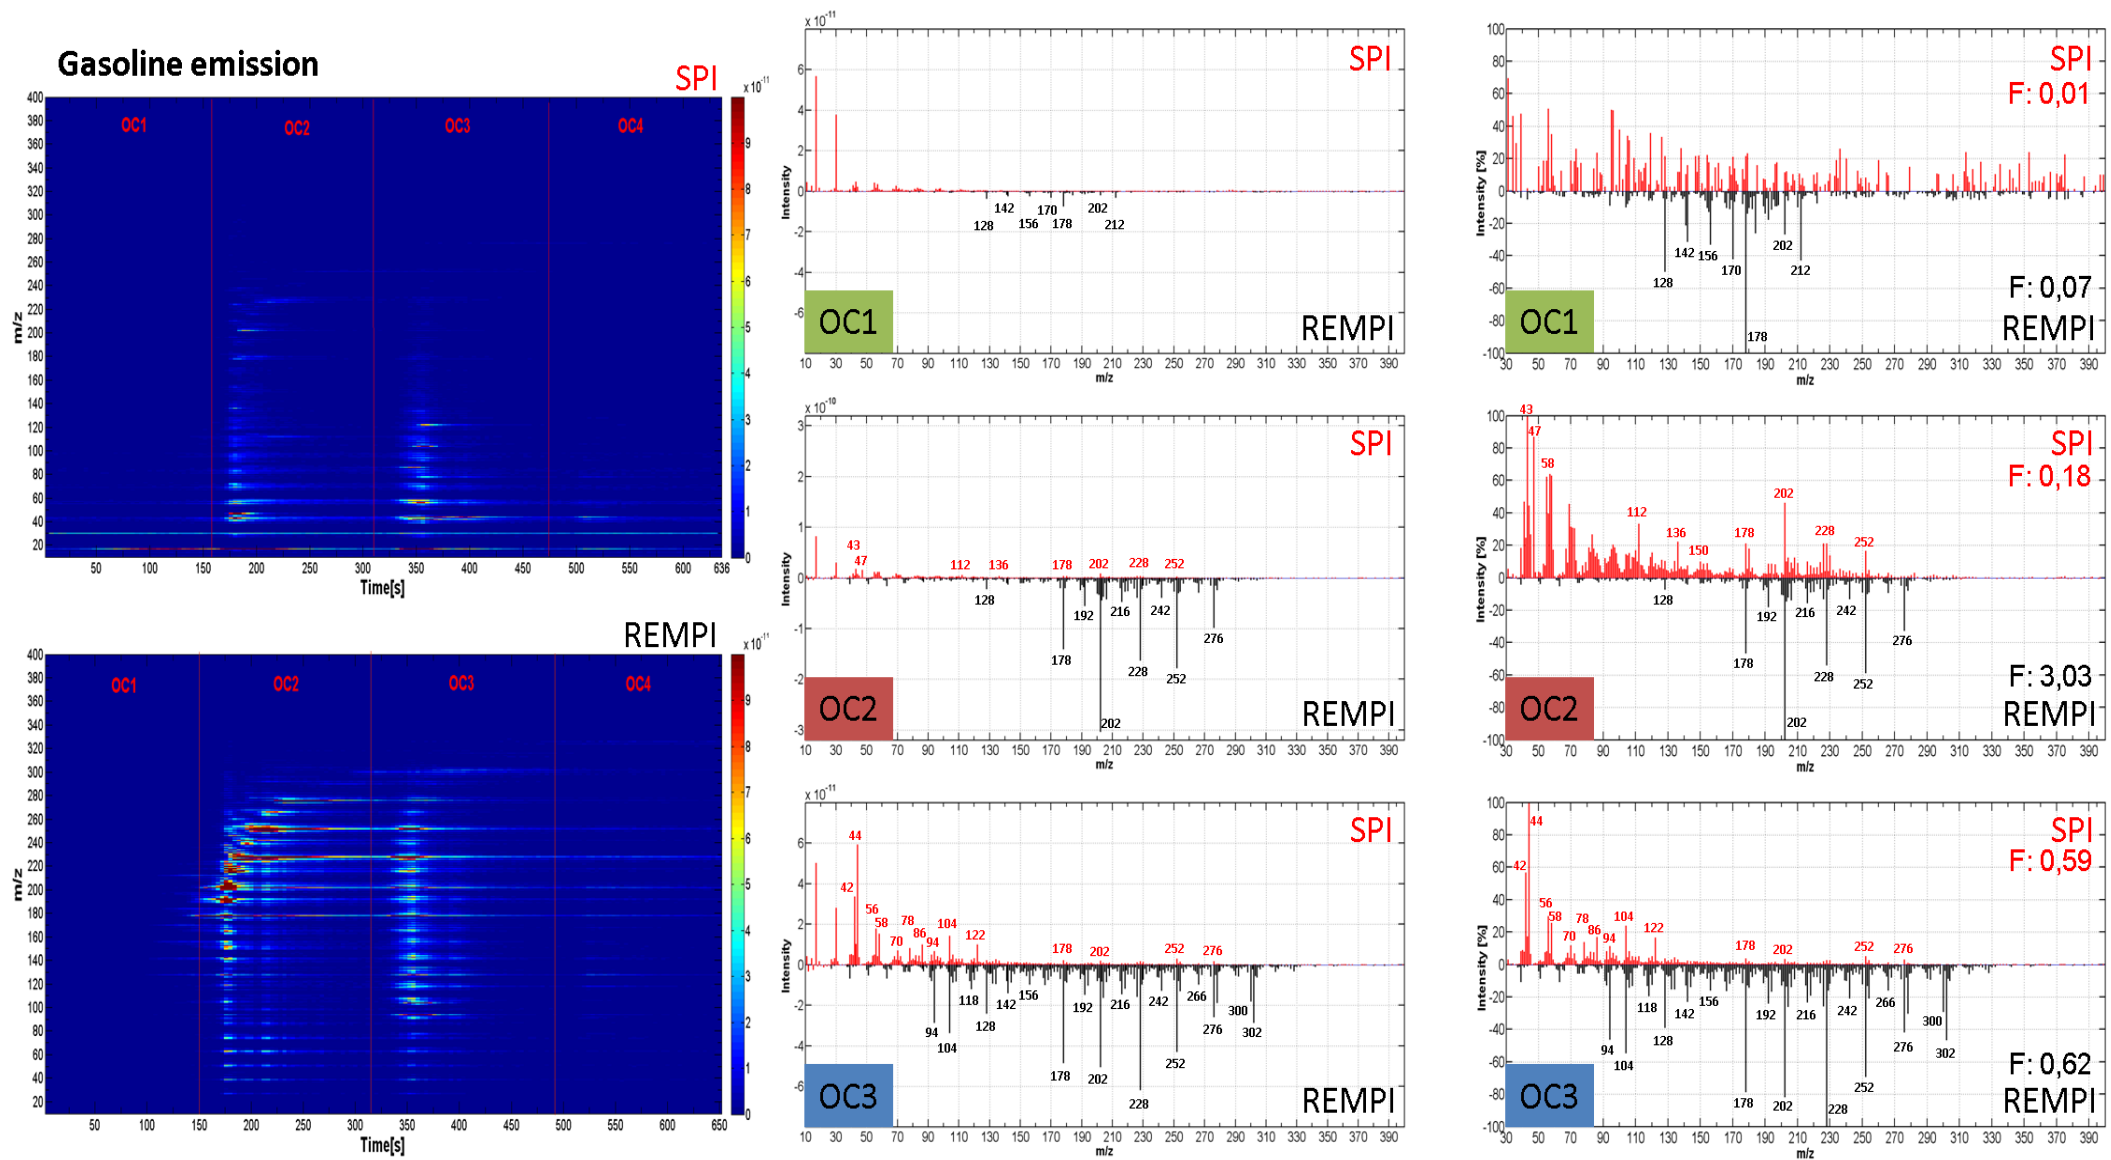

Figure S4: Two-dimensional mass spectrum of the course of signals (m/z) over the four OC-steps (left) for SPI (top) and REMPI (bottom), mass spectra for the first three OC-steps (SPI-red, REMPI-black) (middle), mass spectra for the first three OC-steps normalized to 100 % (right) of the gasoline emission sample . Measured with the IMPROVE protocol.

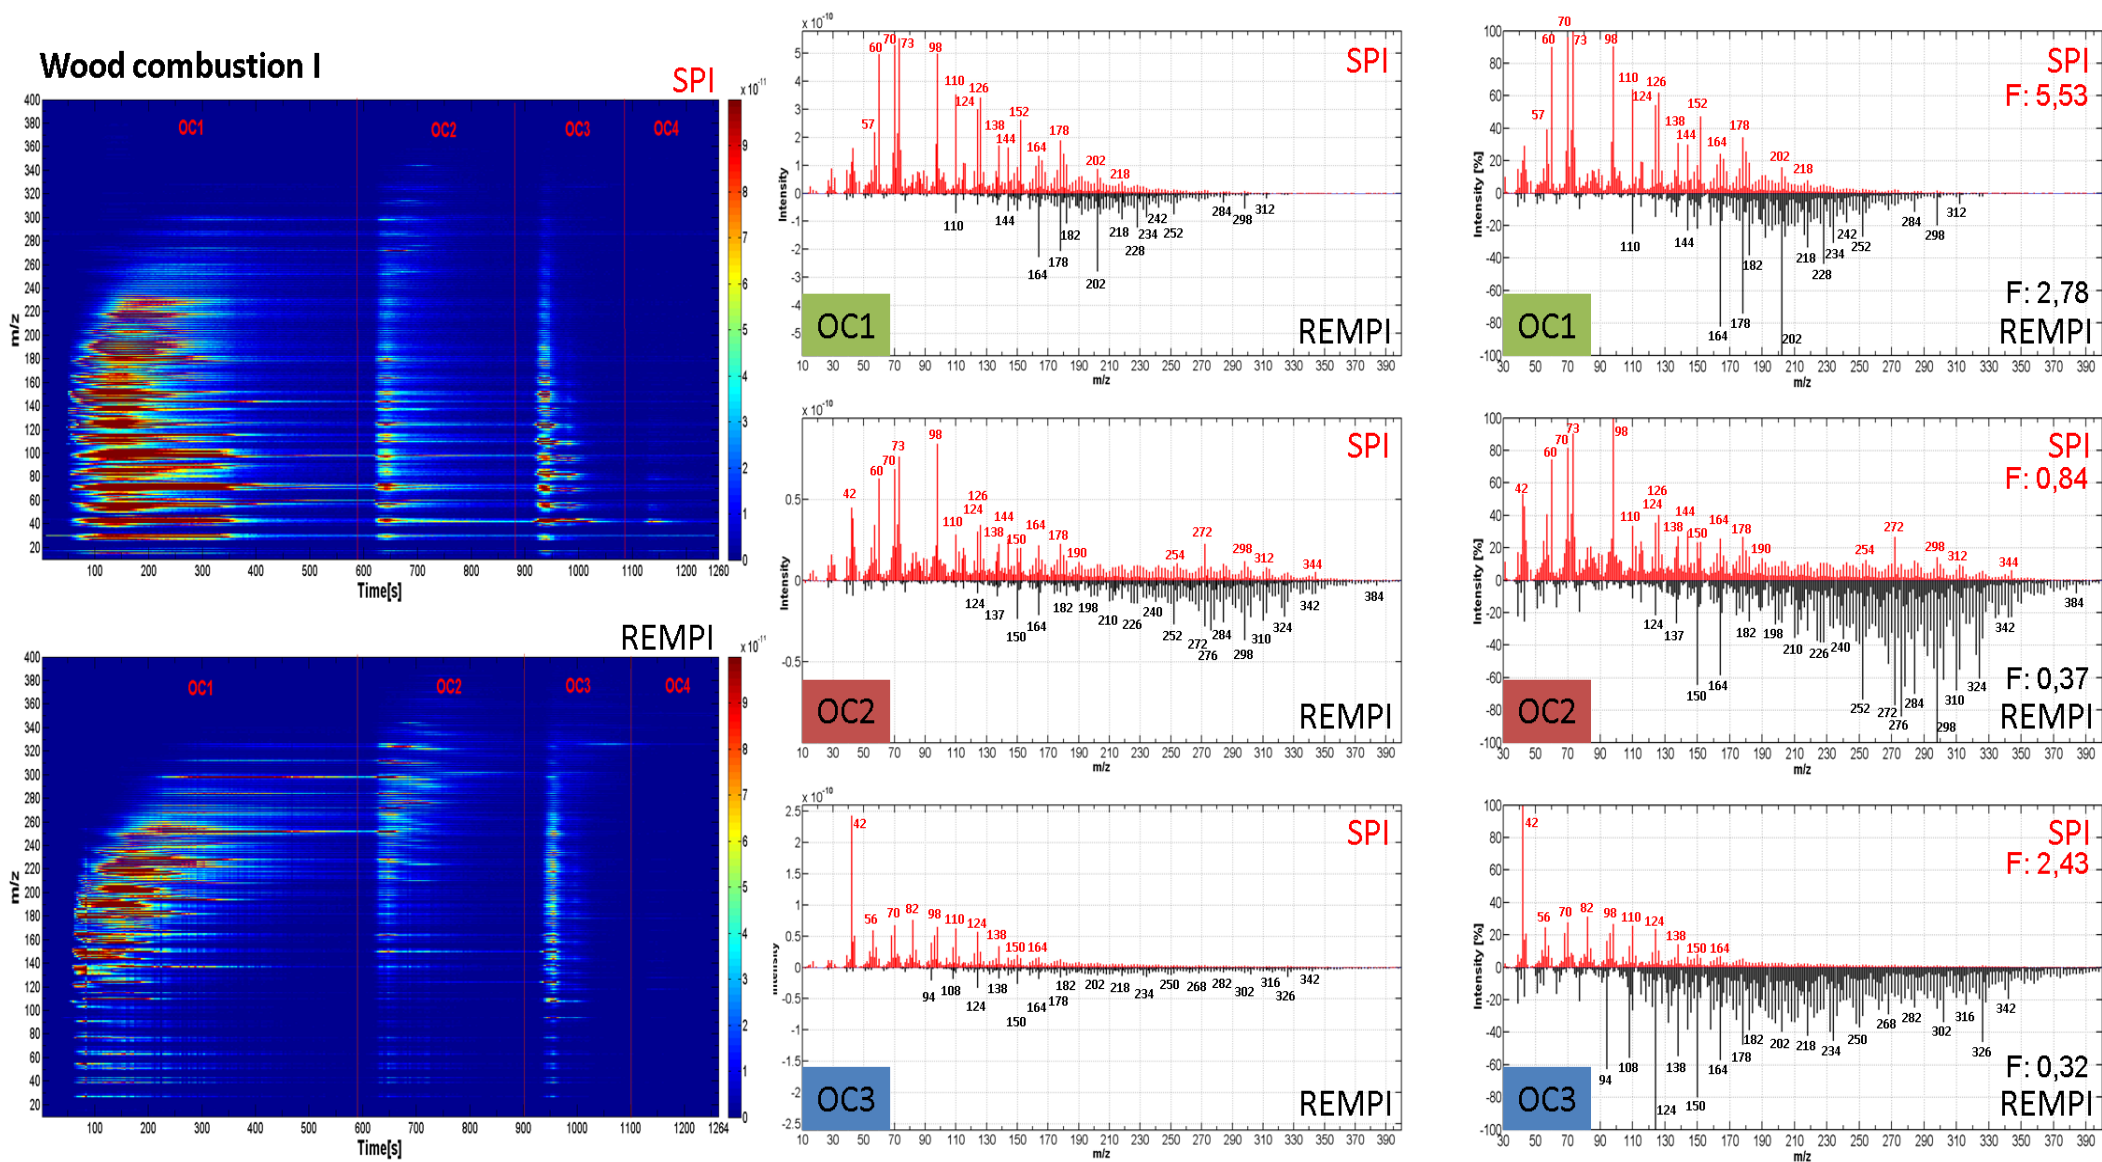

Figure S5: Two-dimensional mass spectrum of the course of signals ( $m/z$ ) over the four OC-steps (left) for SPI (top) and REMPI (bottom), mass spectra for the first three OC-steps (SPI-red, REMPI-black) (middle), mass spectra for the first three OC-steps normalized to 100 % (right) of the wood combustion emission sample from the starting phase. Measured with the IMPROVE protocol.



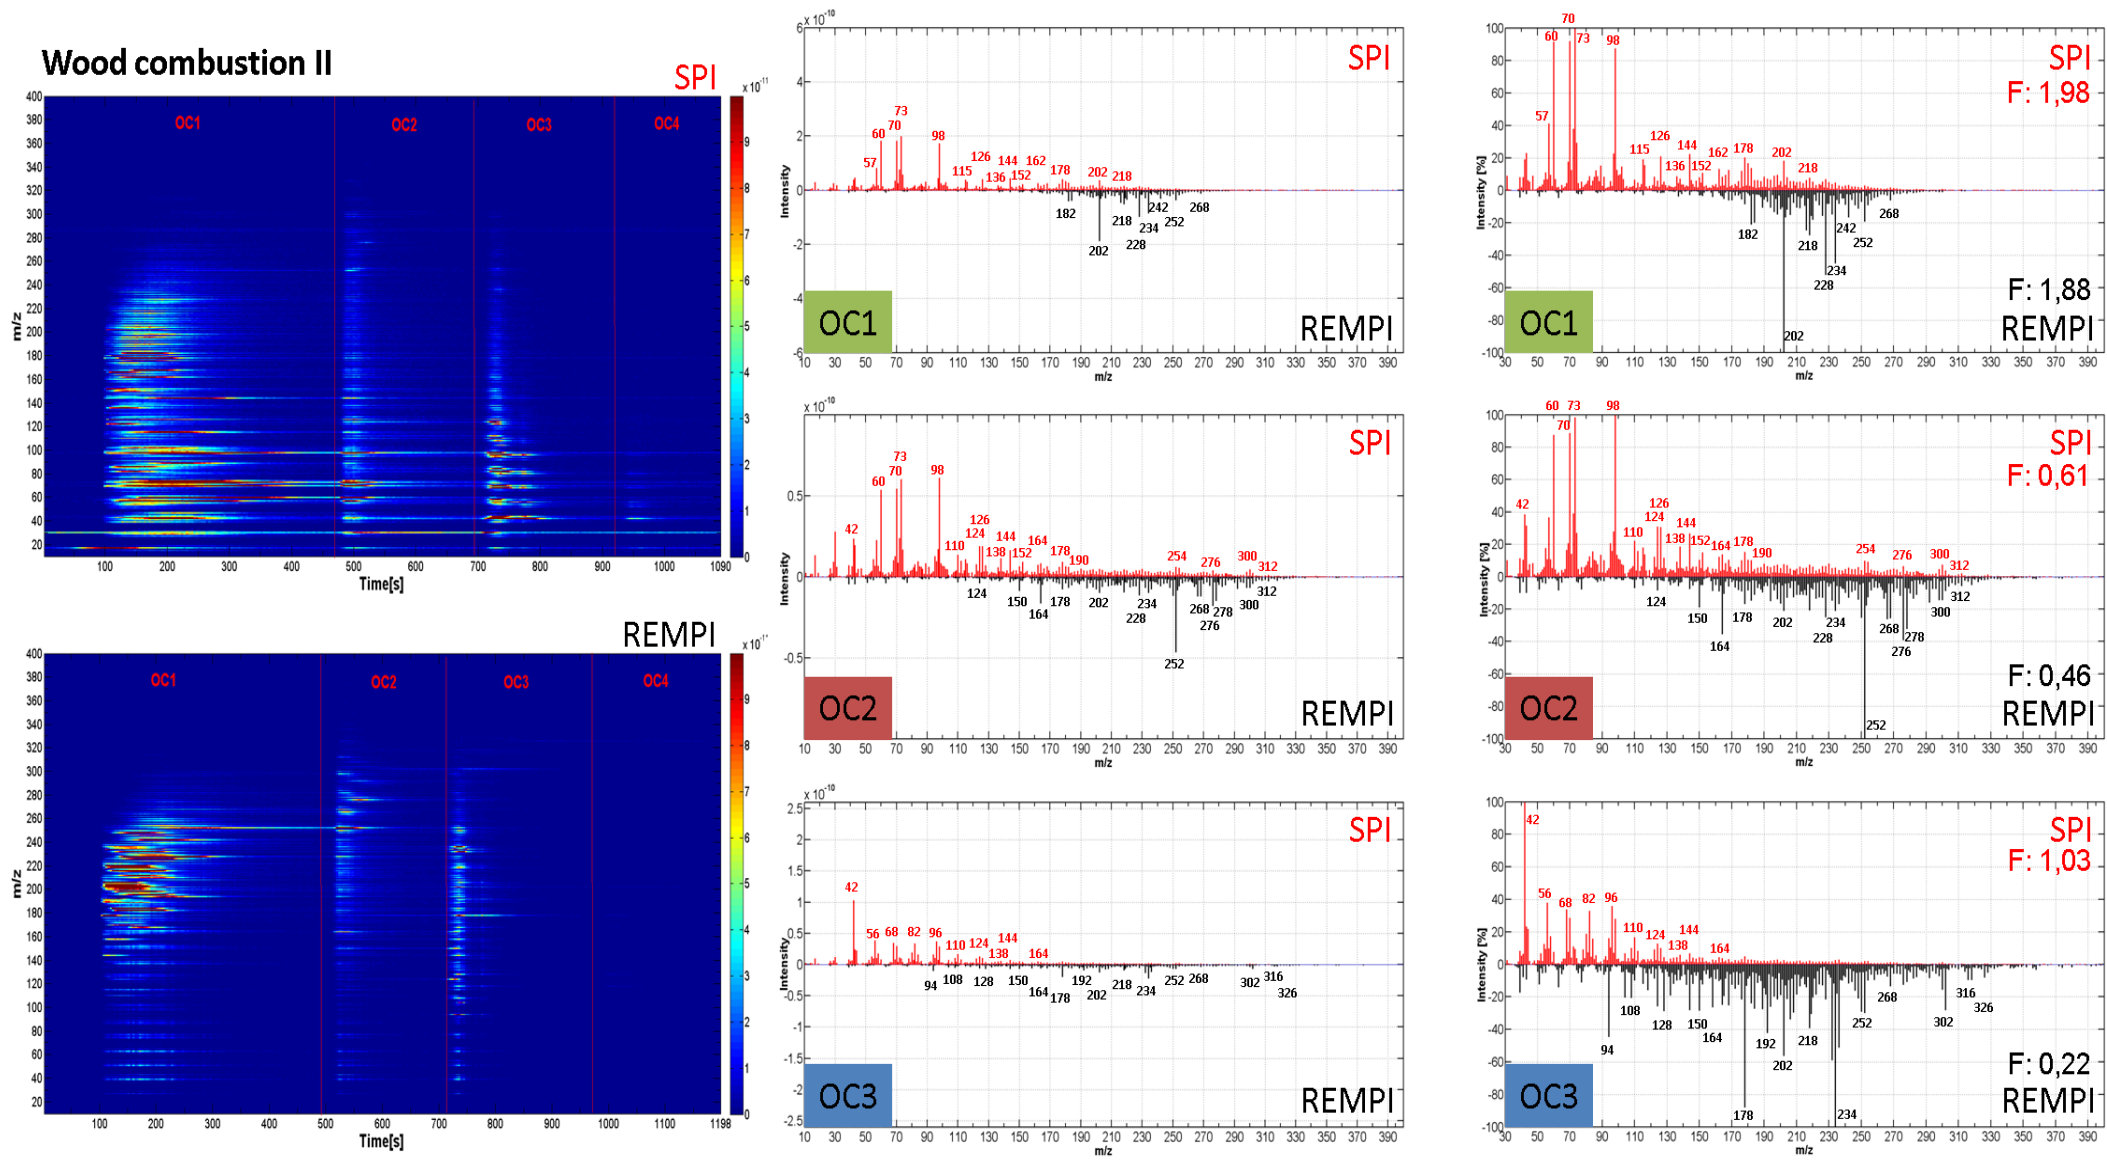

Figure S6: Two-dimensional mass spectrum of the course of signals ( $m/z$ ) over the four OC-steps (left) for SPI (top) and REMPI (bottom), mass spectra for the first three OC-steps (SPI-red, REMPI-black) (middle), mass spectra for the first three OC-steps normalized to 100 % (right) of the wood combustion emission sample from the nominal load phase. Measured with the IMPROVE protocol.

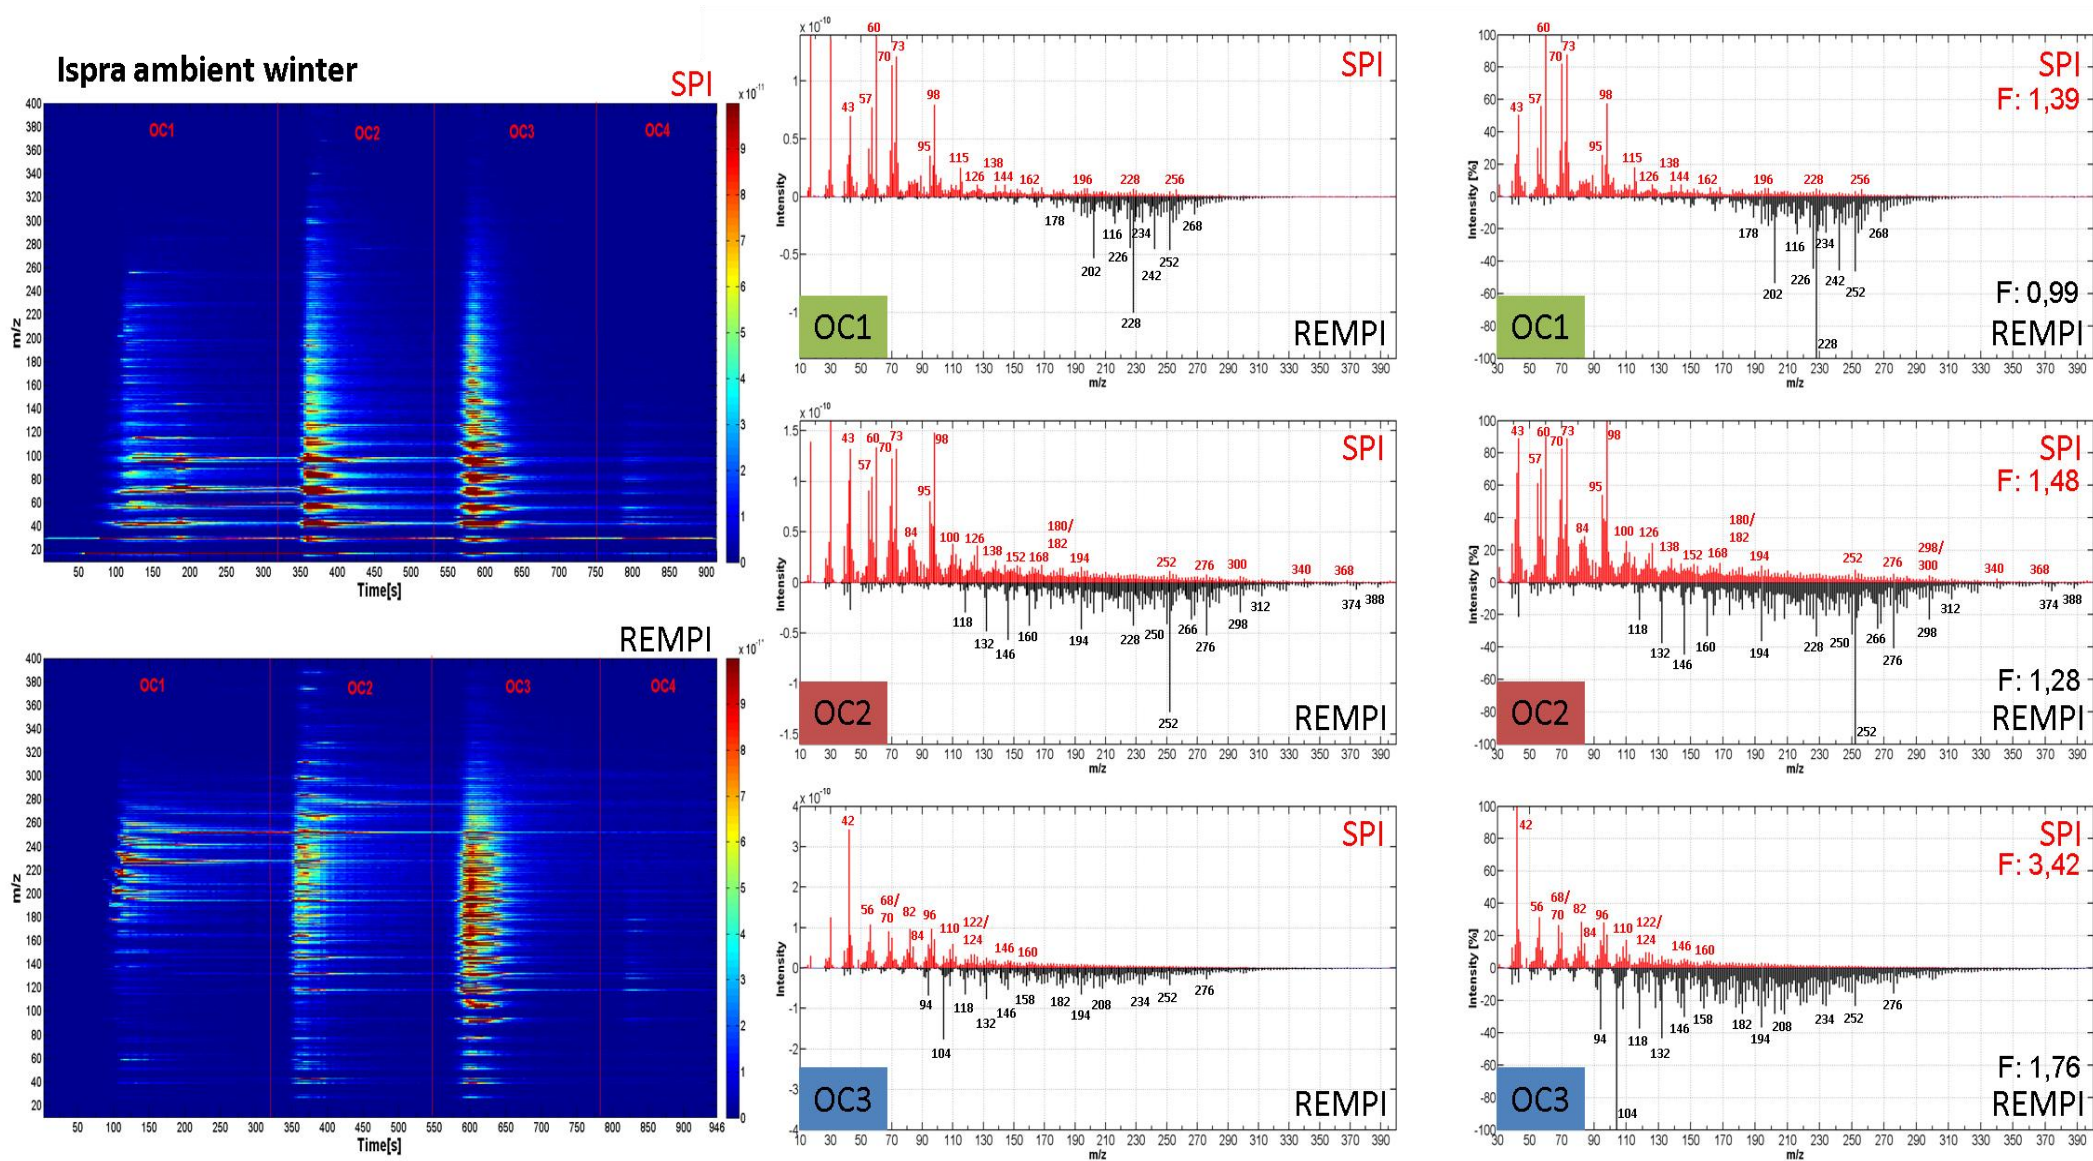

Figure S7: Two-dimensional mass spectrum of the course of signals (m/z) over the four OC-steps (left) for SPI (top) and REMPI (bottom), mass spectra for the first three OC-steps (SPI-red, REMPI-black) (middle), mass spectra for the first three OC-steps normalized to 100 % (right) of the ambient winter sample from the rural background site in Ispra, Italy. Measured with the IMPROVE-A protocol.

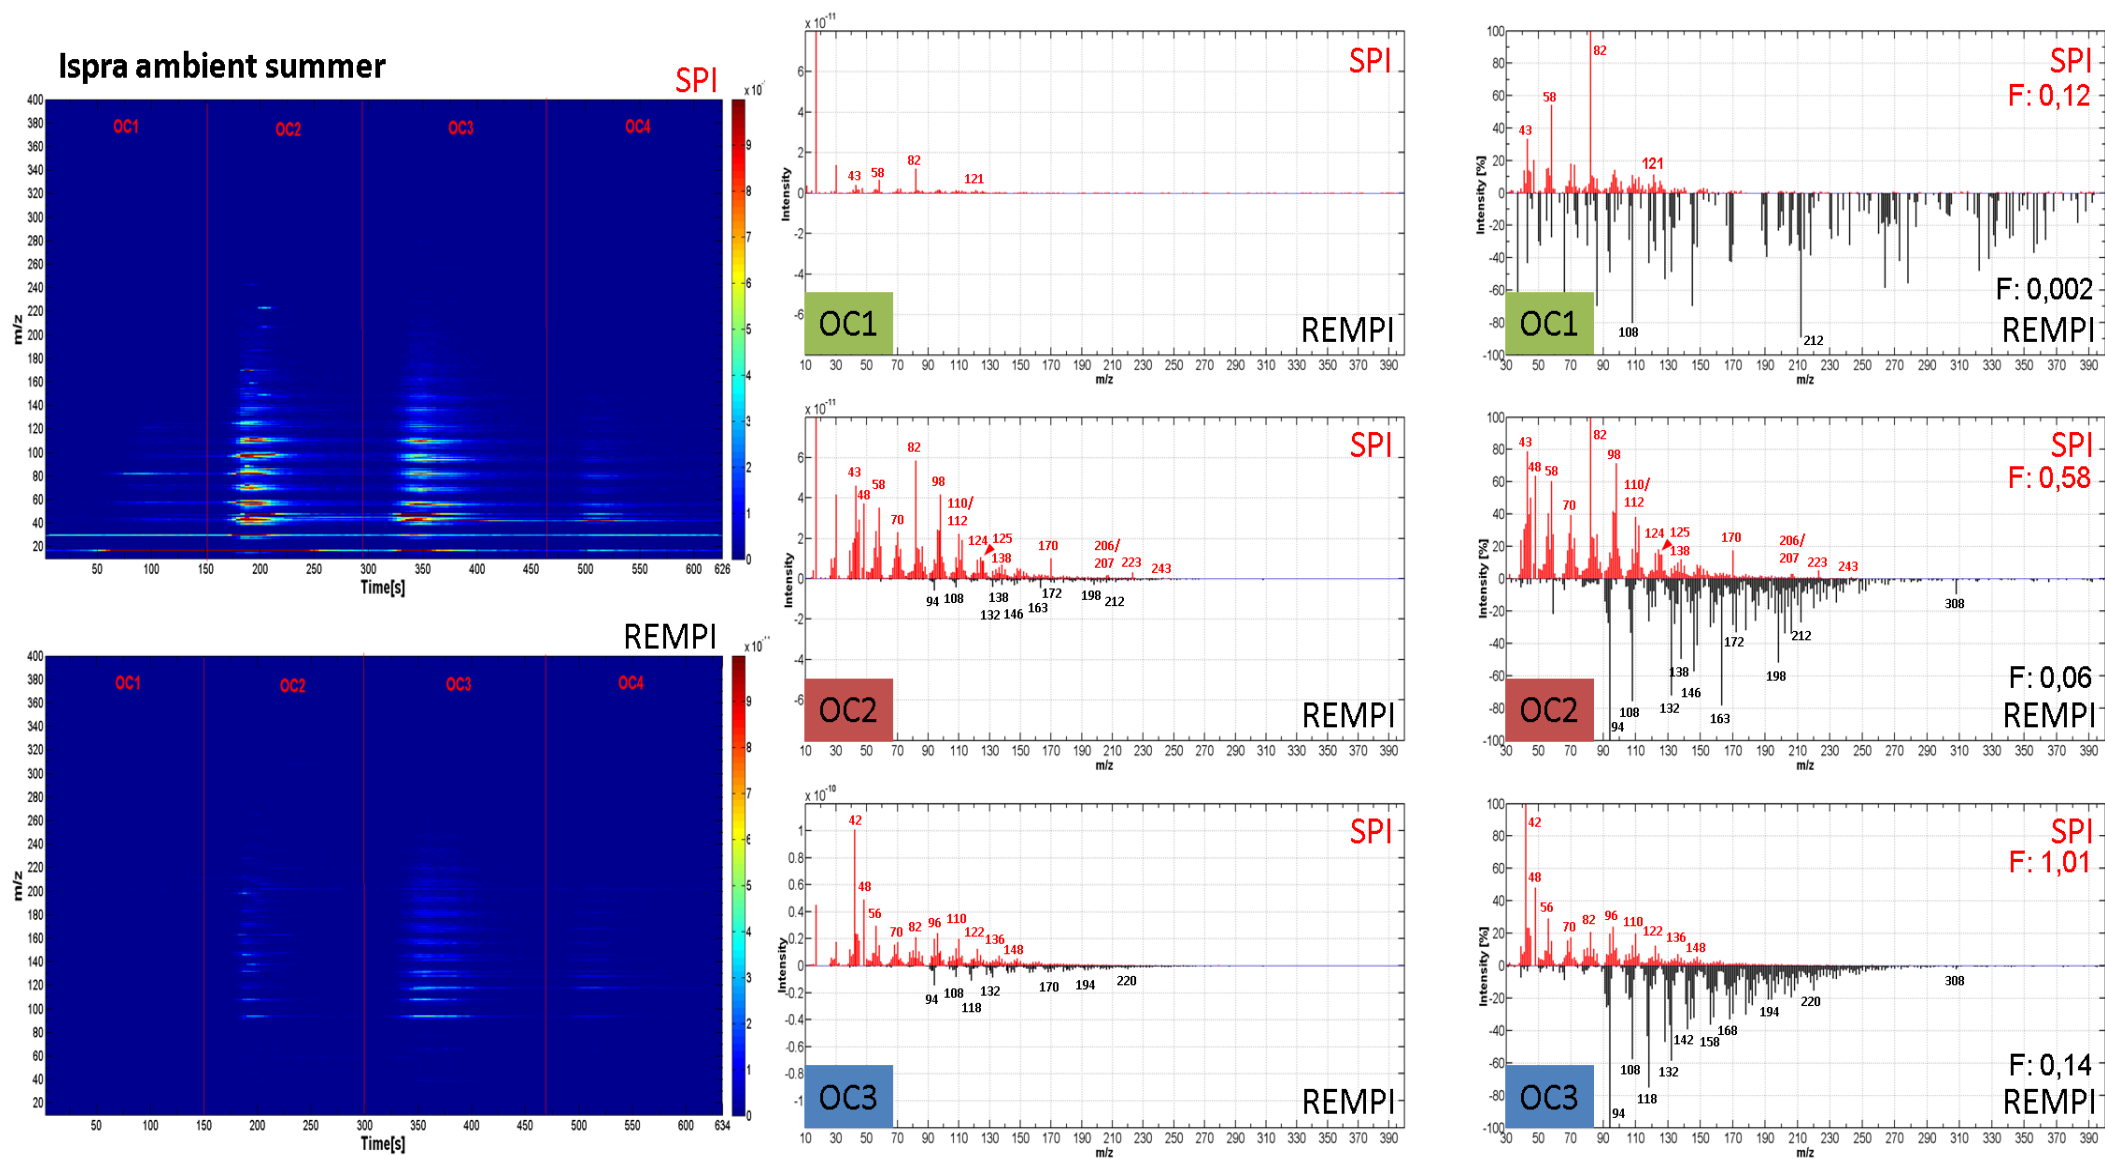

Figure S8: Two-dimensional mass spectrum of the course of signals ( $m/z$ ) over the four OC-steps (left) for SPI (top) and REMPI (bottom), mass spectra for the first three OC-steps (SPI-red, REMPI-black) (middle), mass spectra for the first three OC-steps normalized to 100 % (right) of the ambient summer sample from the rural background site in Ispra, Italy. Measured with the IMPROVE-A protocol.



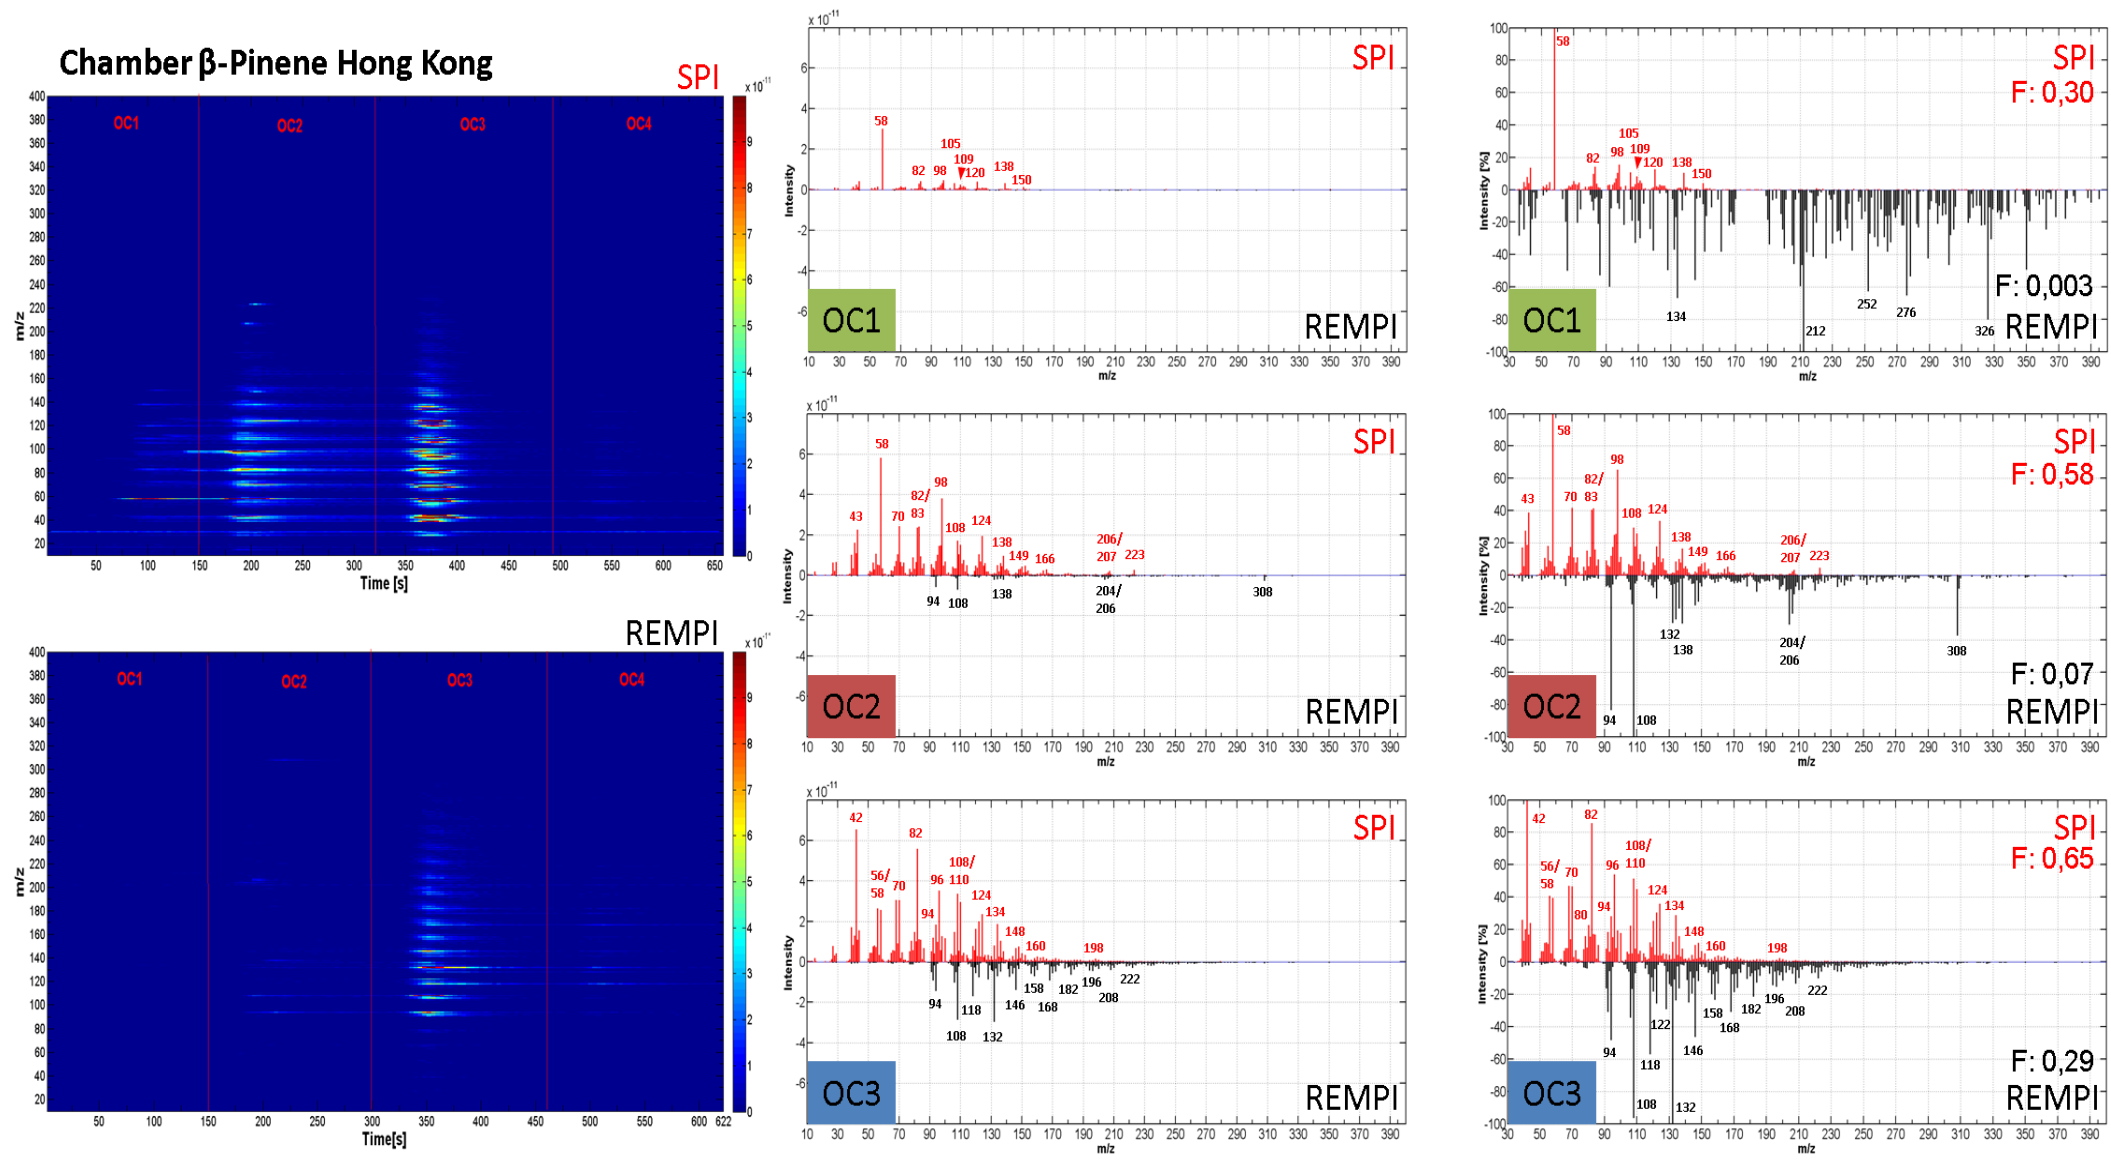

Figure S9: Two-dimensional mass spectrum of the course of signals ( $m/z$ ) over the four OC-steps (left) for SPI (top) and REMPI (bottom), mass spectra for the first three OC-steps (SPI-red, REMPI-black) (middle), mass spectra for the first three OC-steps normalized to 100 % (right) of the chamber experiment performed in Hong Kong with  $\beta$ -Pinene as a precursor. Measured with the IMPROVE-A protocol.

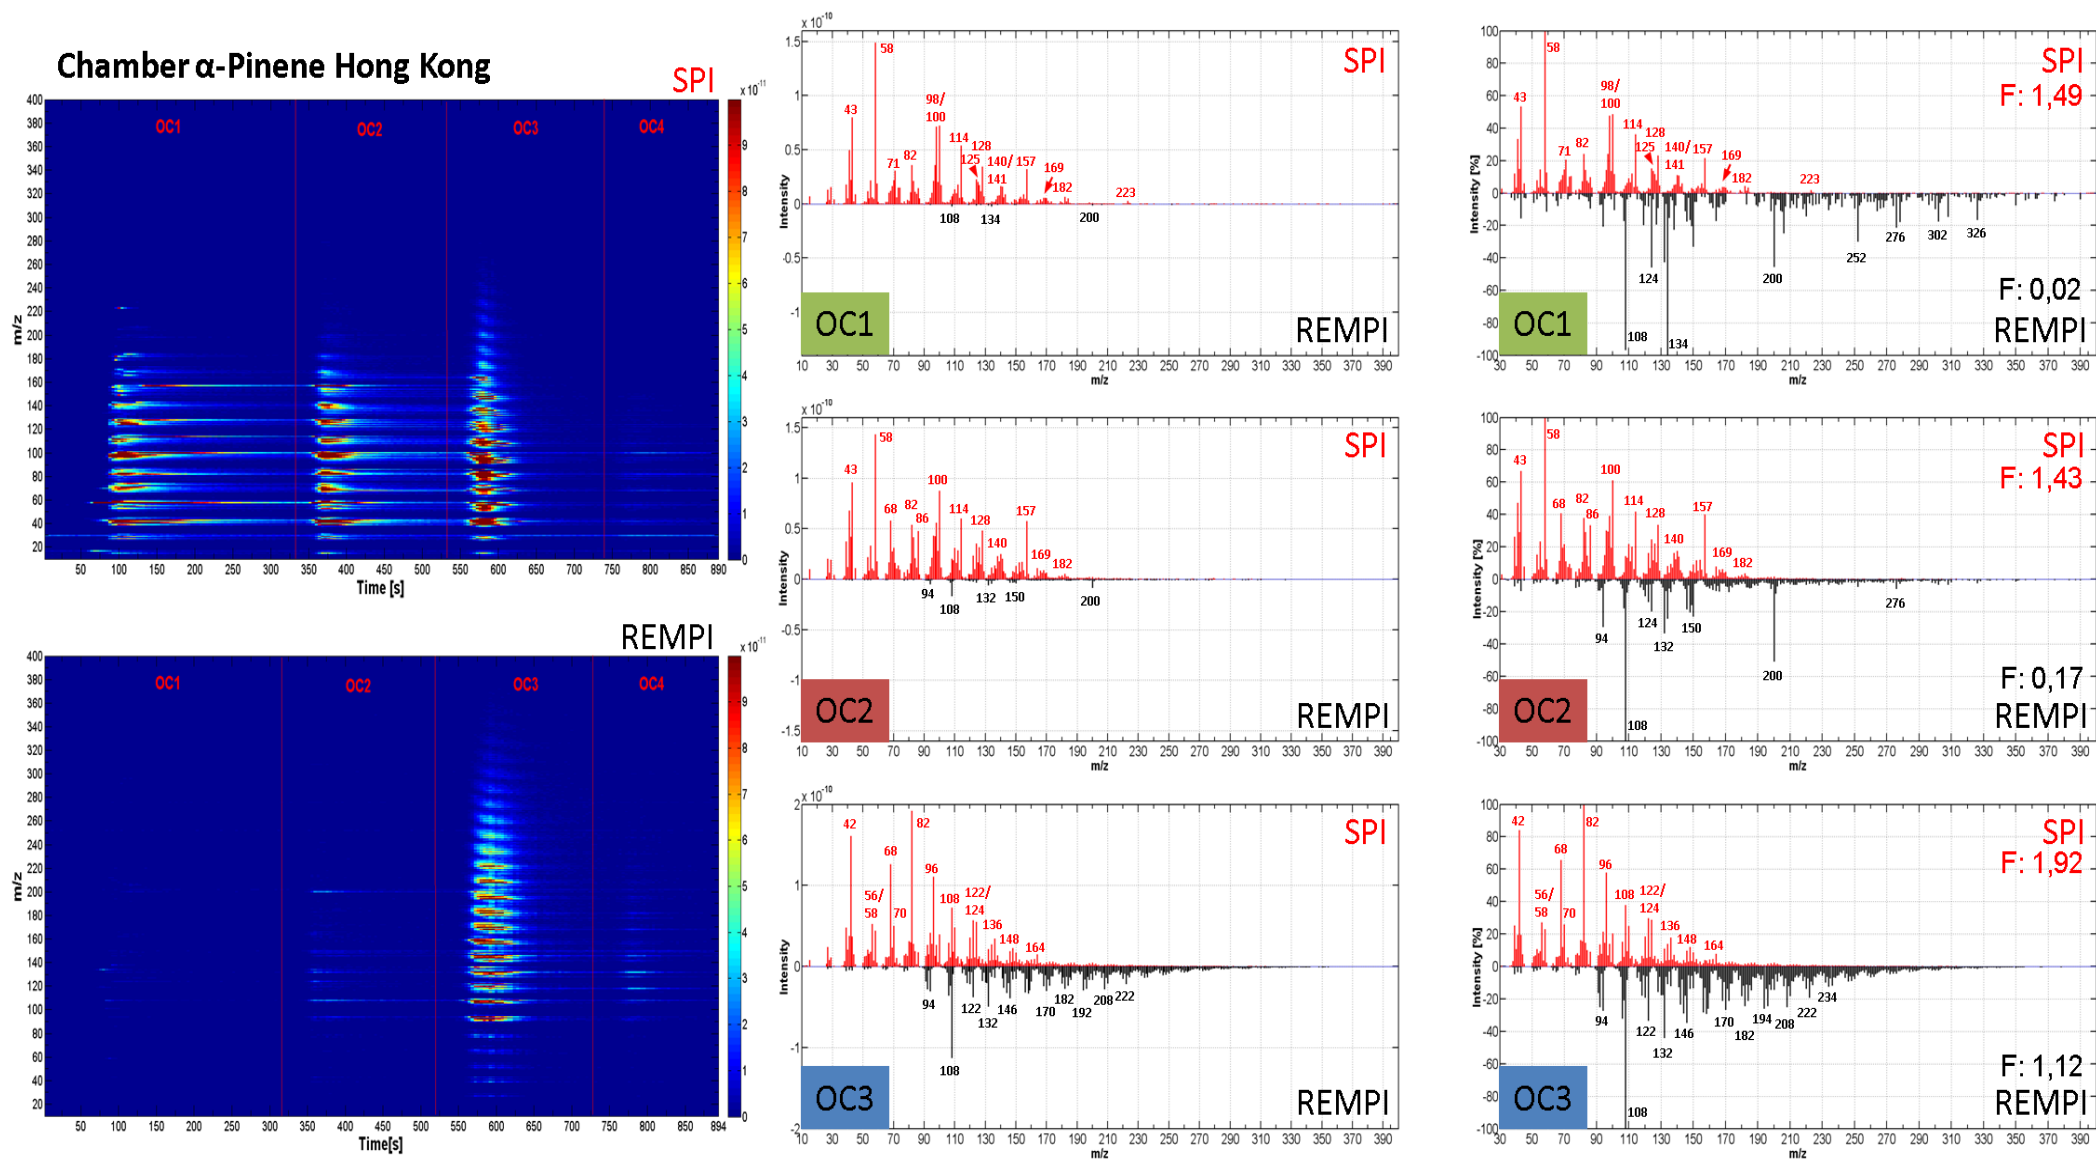

Figure S10: Two-dimensional mass spectrum of the course of signals (m/z) over the four OC-steps (left) for SPI (top) and REMPI (bottom), mass spectra for the first three OC-steps (SPI-red, REMPI-black) (middle), mass spectra for the first three OC-steps normalized to 100 % (right) of the chamber experiment performed in Hong Kong with  $\alpha$ -Pinene as a precursor. Measured with the IMPROVE-A protocol.

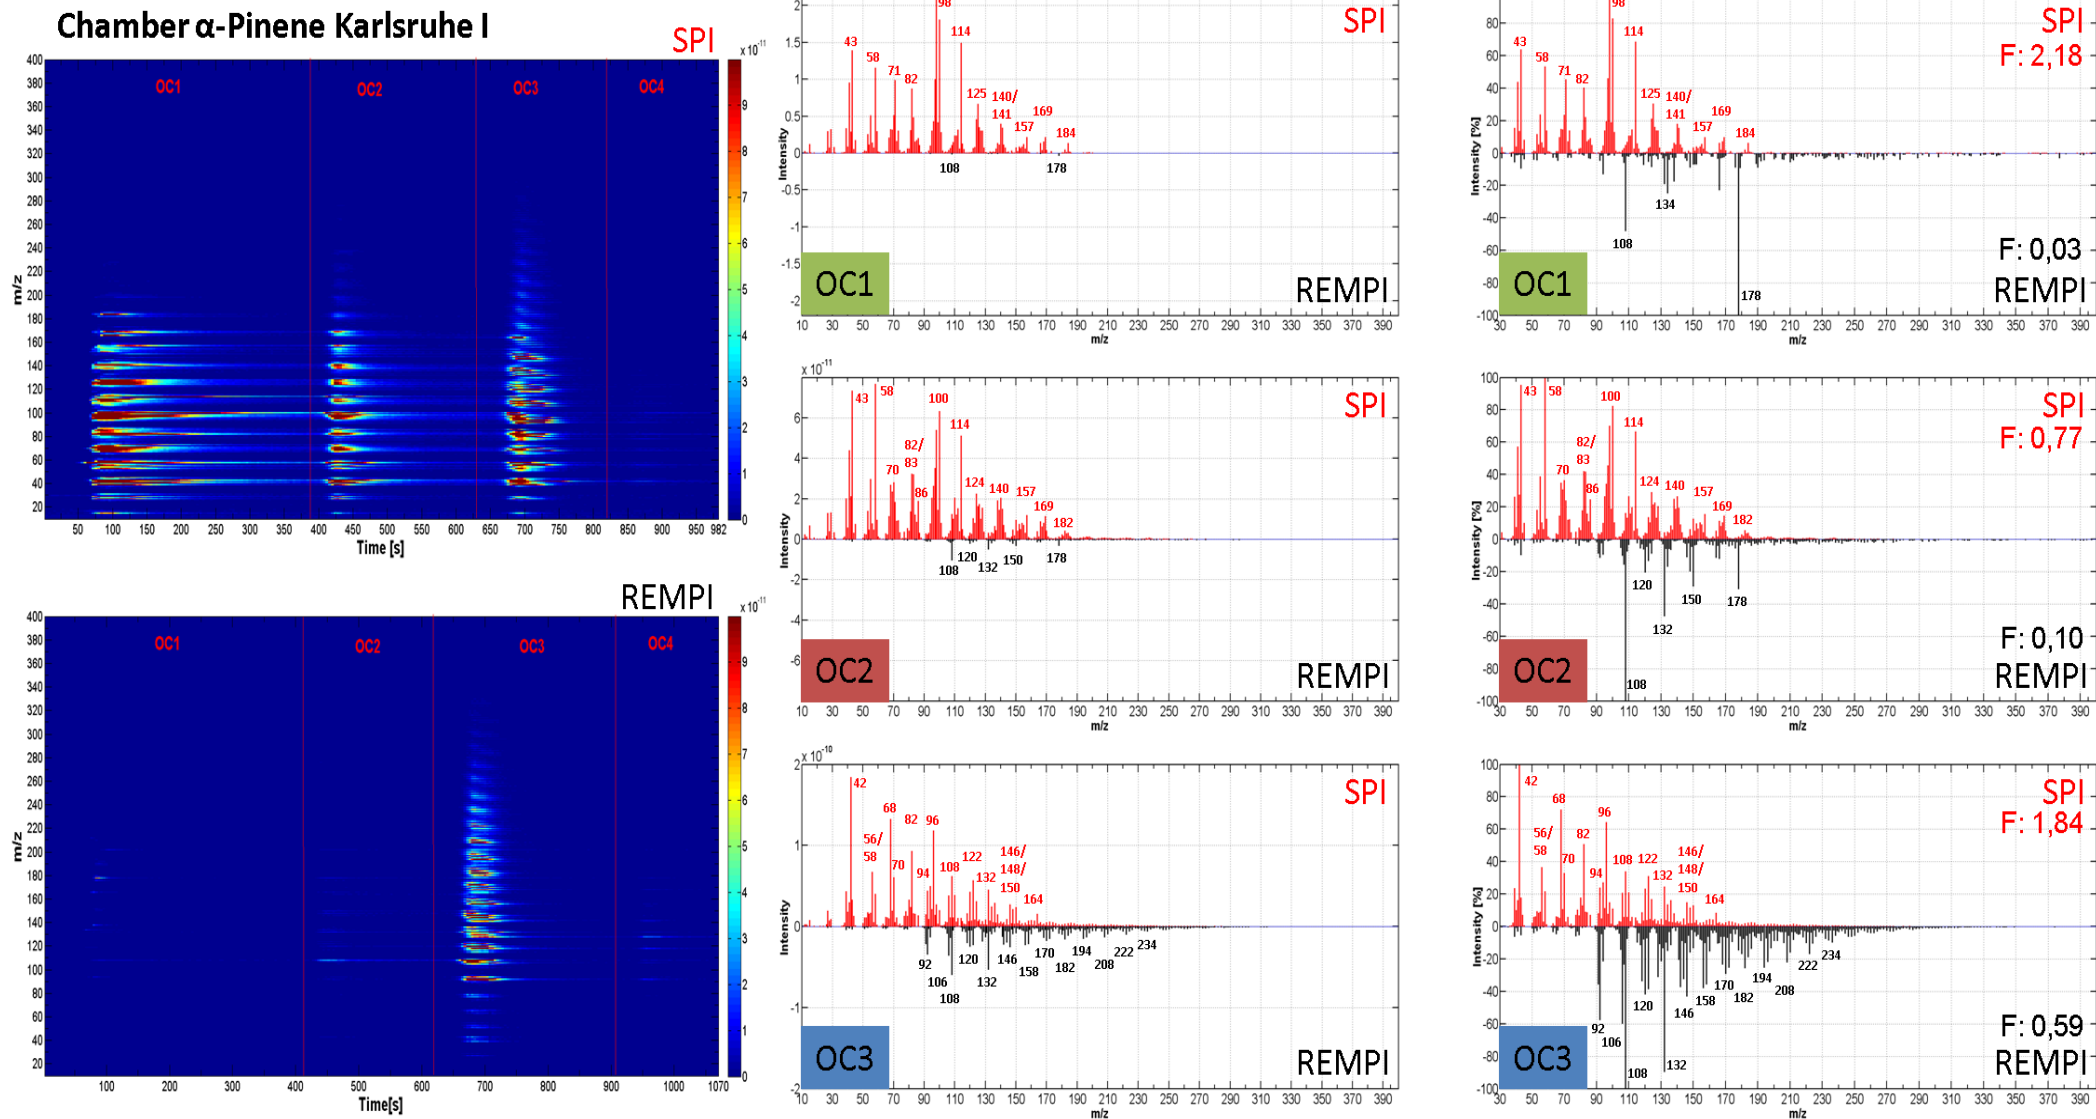

Figure S11: Two-dimensional mass spectrum of the course of signals ( $m/z$ ) over the four OC-steps (left) for SPI (top) and REMPI (bottom), mass spectra for the first three OC-steps (SPI-red, REMPI-black) (middle), mass spectra for the first three OC-steps normalized to 100 % (right) of the chamber experiment performed in Karlsruhe with  $\alpha$ -Pinene as a precursor. Measured with the IMPROVE-A protocol.

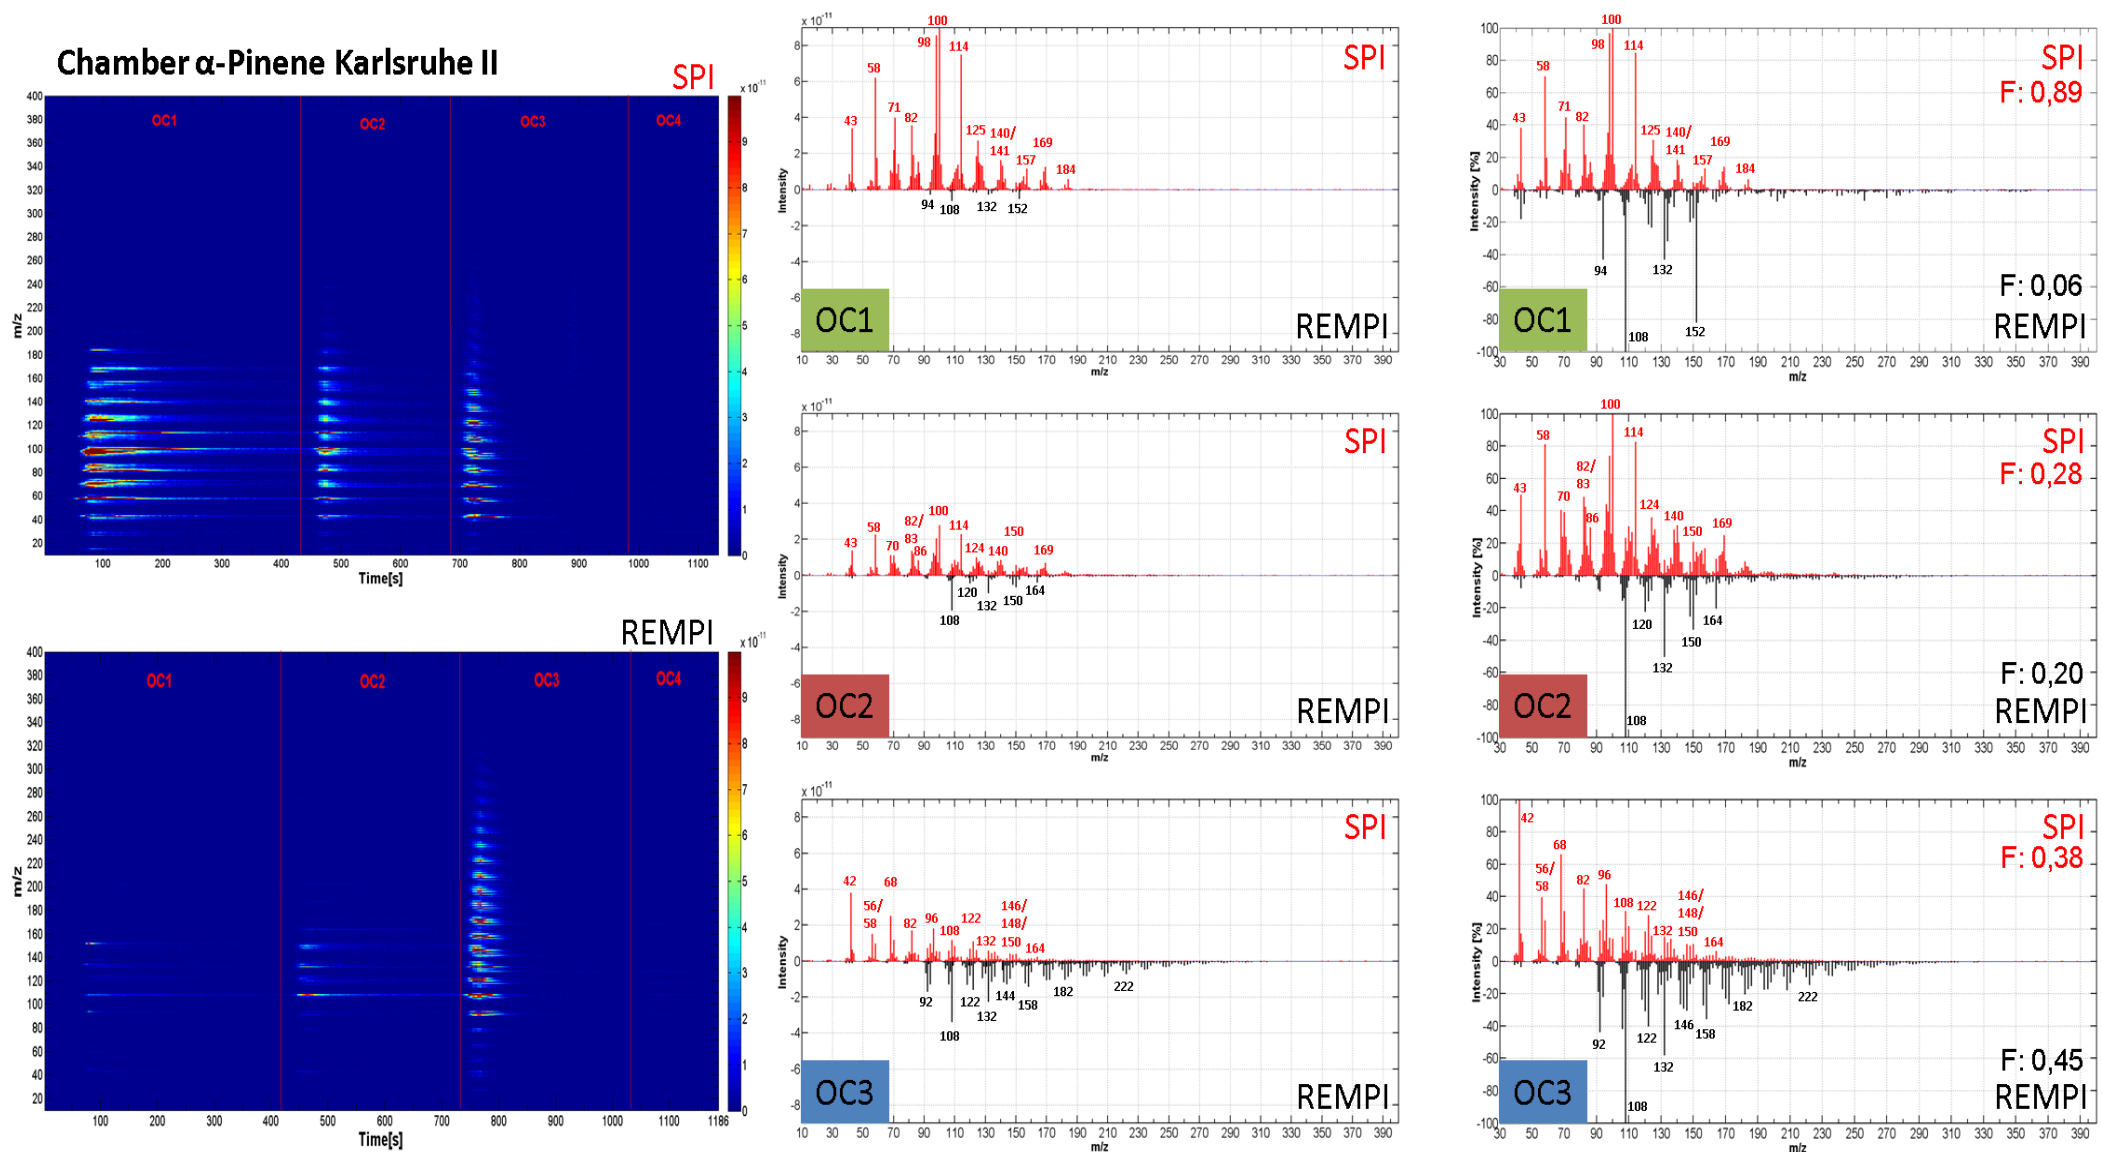

Figure S12: Two-dimensional mass spectrum of the course of signals (m/z) over the four OC-steps (left) for SPI (top) and REMPI (bottom), mass spectra for the first three OC-steps (SPI-red, REMPI-black) (middle), mass spectra for the first three OC-steps normalized to 100 % (right) of the chamber experiment performed in Karlsruhe with  $\alpha$ -Pinene as a precursor. Measured with the IMPROVE-A protocol.



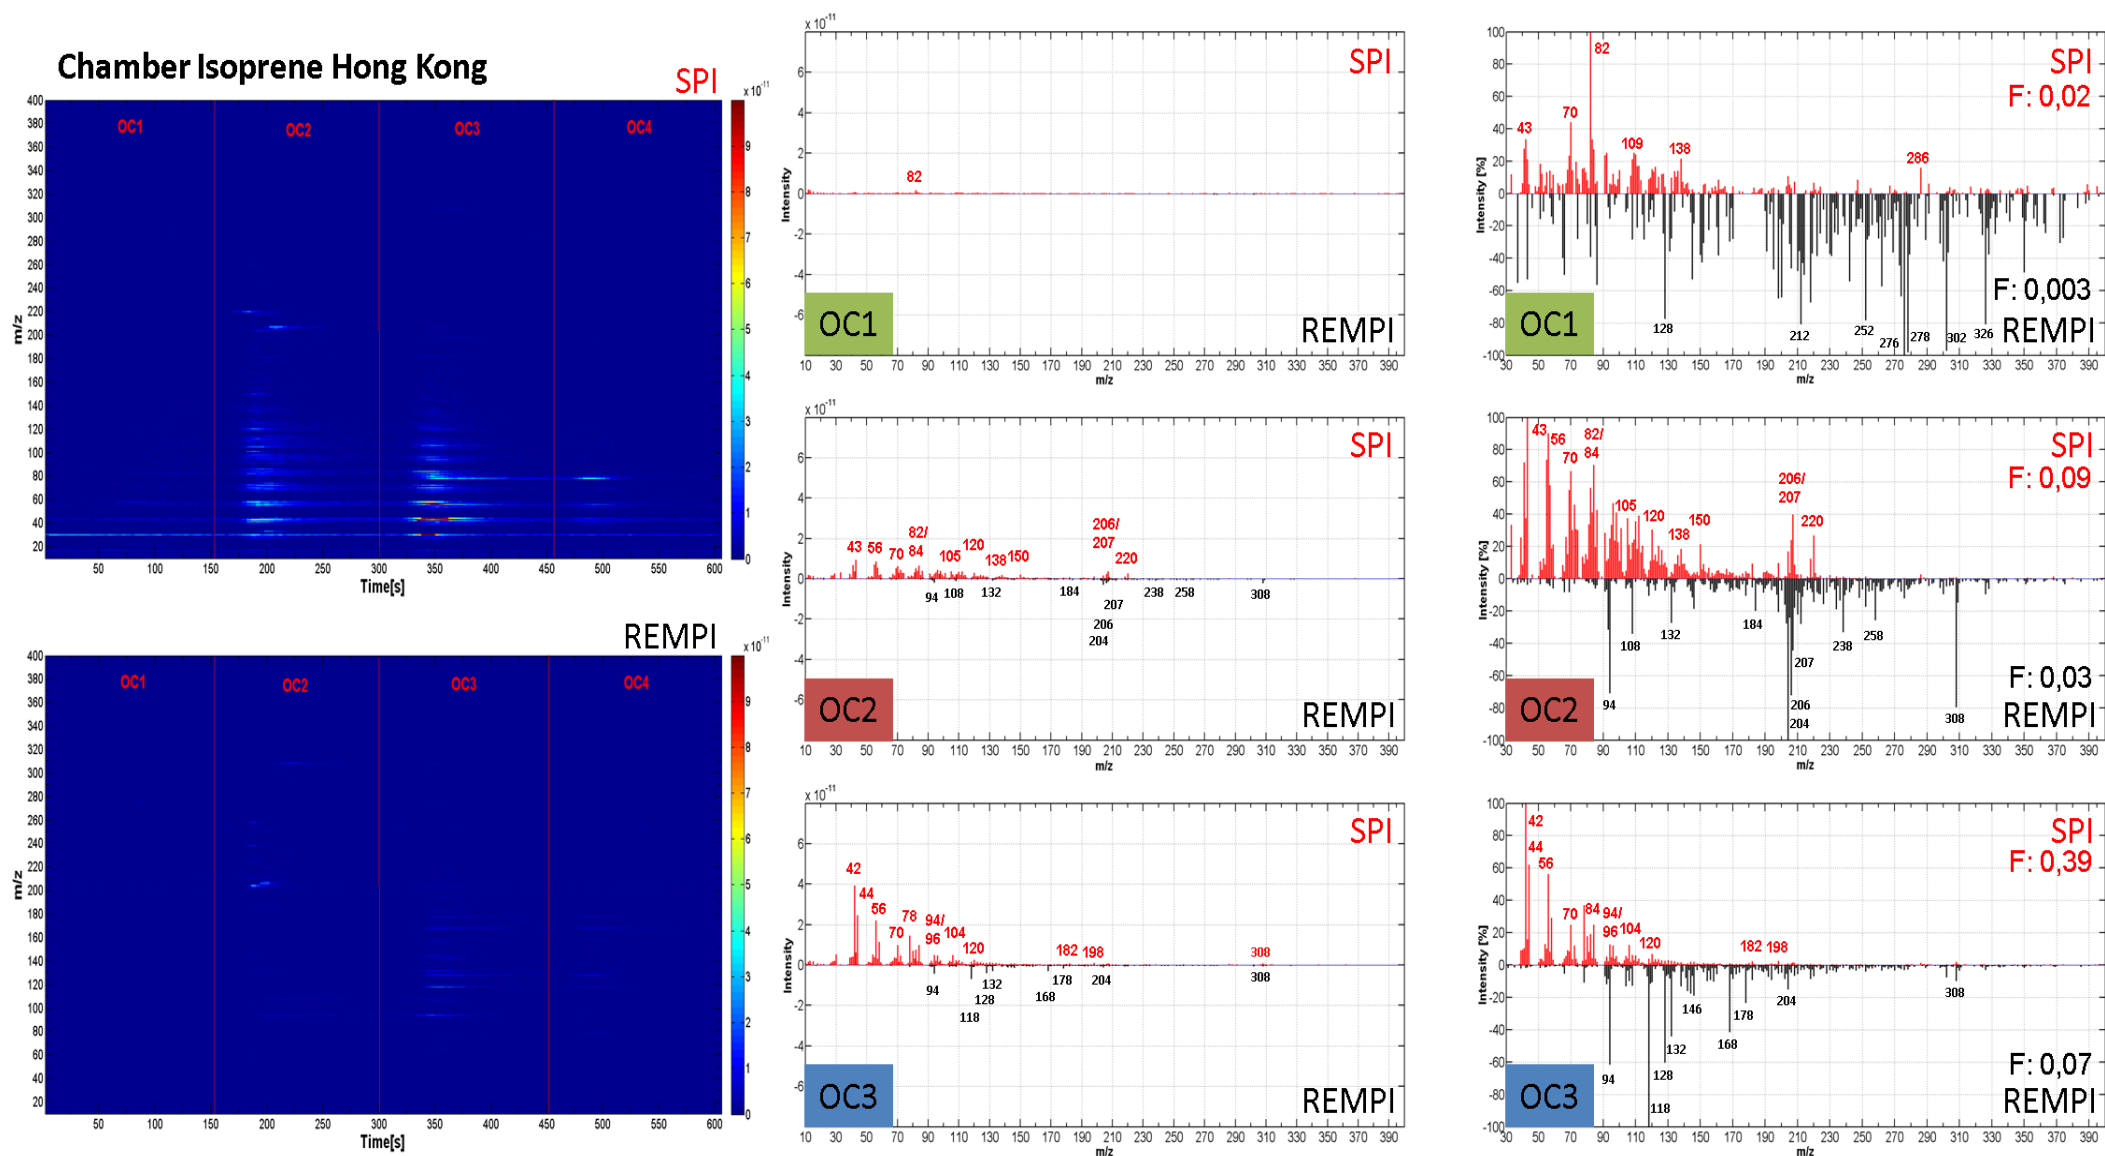

Figure S13: Two-dimensional mass spectrum of the course of signals (m/z) over the four OC-steps (left) for SPI (top) and REMPI (bottom), mass spectra for the first three OC-steps (SPI-red, REMPI-black) (middle), mass spectra for the first three OC-steps normalized to 100 % (right) of the chamber experiment performed in Hong Kong with Isoprene as a precursor. Measured with the IMPROVE-A protocol.

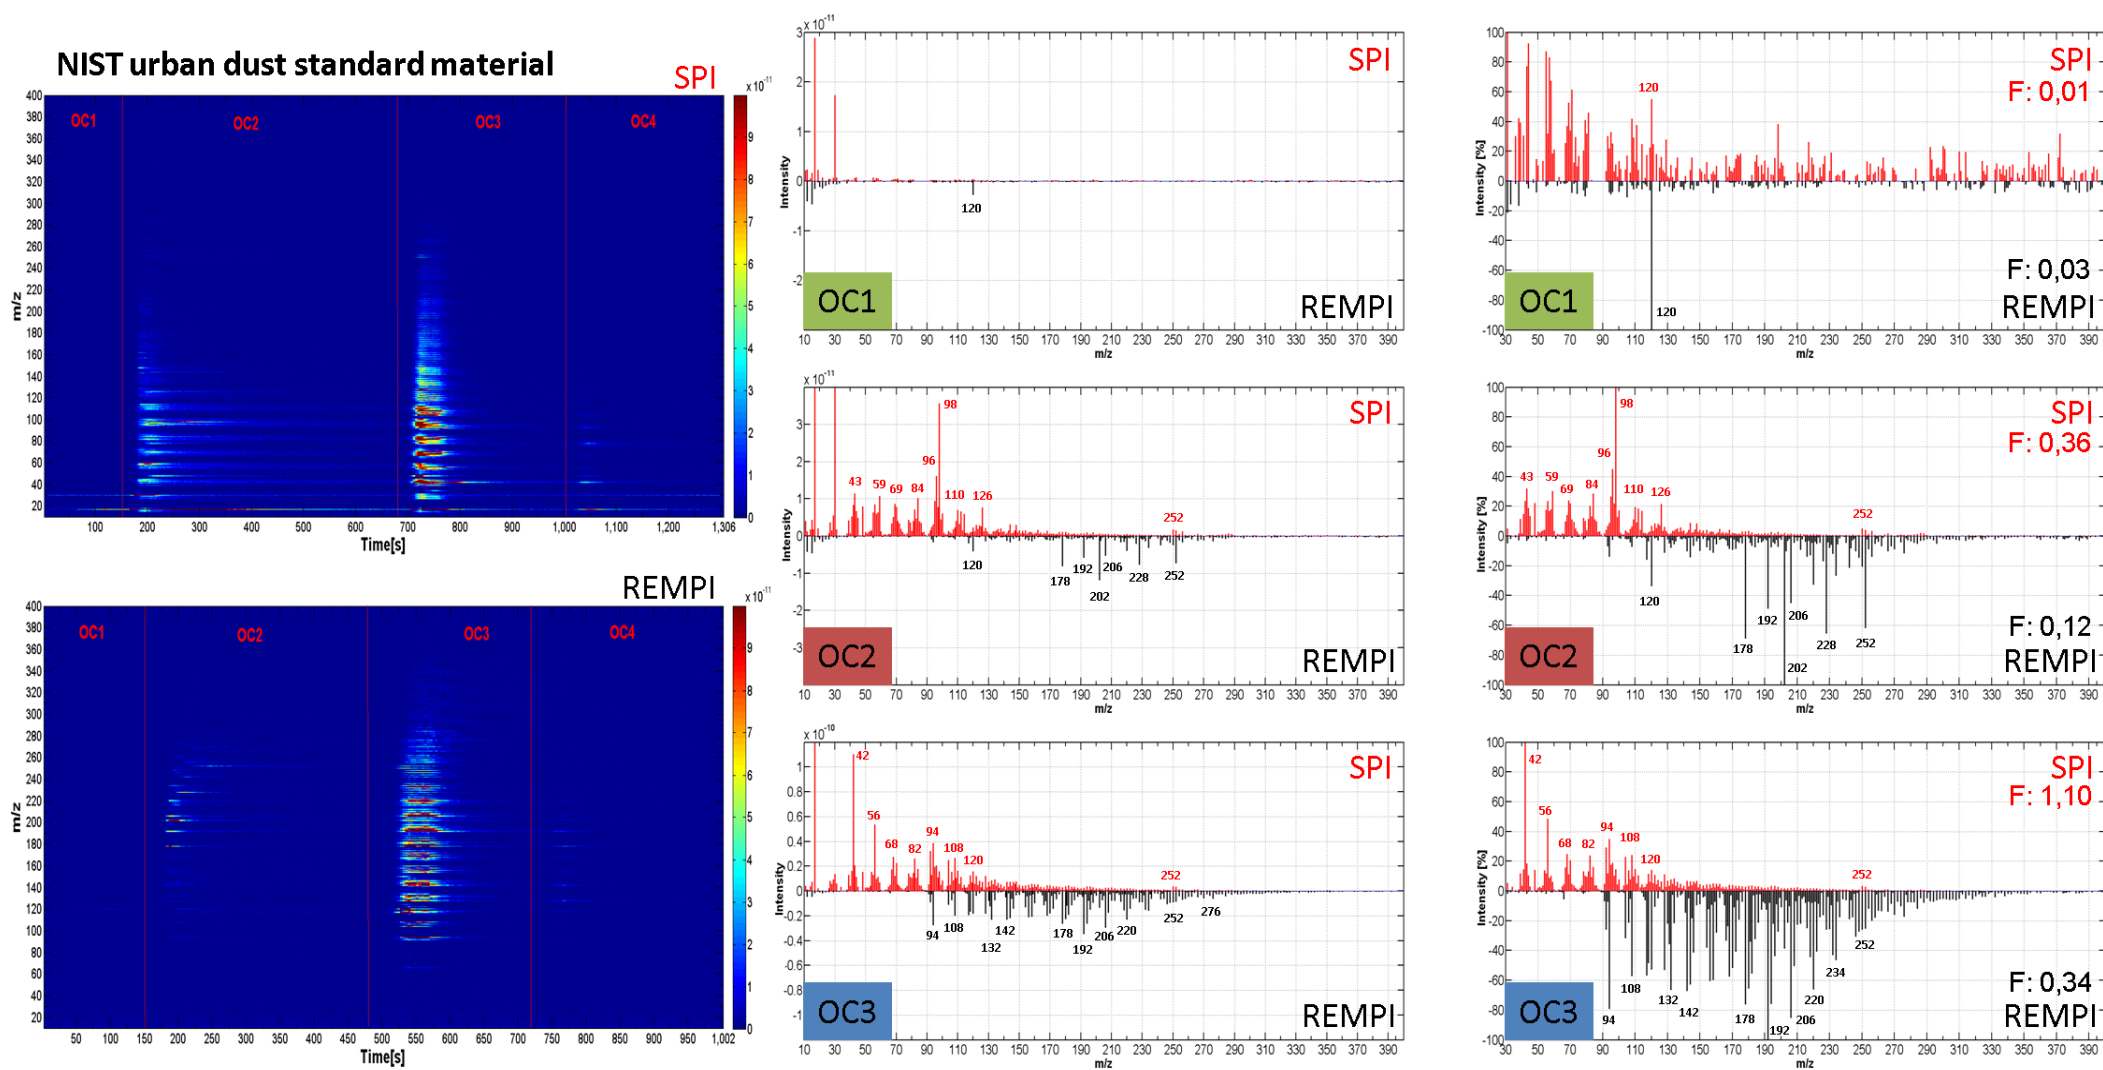

Figure S14: Two-dimensional mass spectrum of the course of signals ( $m/z$ ) over the four OC-steps (left) for SPI (top) and REMPI (bottom), mass spectra for the first three OC-steps (SPI-red, REMPI-black) (middle), mass spectra for the first three OC-steps normalized to 100 % (right) of the NIST urban dust standard material. Measured with the IMPROVE-A protocol.



Table S3: Proposals of the most likely compounds for the signals found in the samples analyzed, whereby (?) means that no suitable compound was found in the literature, (-) mean: not present in the sample, (+) present, (++) dominant signal.

| m/z | structure proposals                                           | samples  |       |        |       |                 |       |              |       |              |       |             |       |             |       |             |       |
|-----|---------------------------------------------------------------|----------|-------|--------|-------|-----------------|-------|--------------|-------|--------------|-------|-------------|-------|-------------|-------|-------------|-------|
|     |                                                               | gasoline |       | diesel |       | wood combustion |       | Italy winter |       | Italy summer |       | β-Pinene HK |       | α-Pinene HK |       | α-Pinene KR |       |
|     |                                                               | SPI      | REMPI | SPI    | REMPI | SPI             | REMPI | SPI          | REMPI | SPI          | REMPI | SPI         | REMPI | SPI         | REMPI | SPI         | REMPI |
| 41  | alkyl fragment                                                | -        | -     | +      | -     | -               | -     | -            | -     | -            | -     | +           | -     | -           | -     | +           | -     |
| 42  | propene                                                       | ++       | -     | ++     | -     | ++              | -     | ++           | -     | ++           | -     | ++          | -     | ++          | -     | ++          | -     |
| 43  | alkyl fragment                                                | +        | -     | +      | -     | -               | -     | ++           | -     | ++           | -     | +           | -     | ++          | -     | ++          | -     |
| 44  | acetaldehyde                                                  | ++       | -     | -      | -     | -               | -     | -            | -     | -            | -     | -           | -     | -           | -     | -           | -     |
| 47  | ?                                                             | +        | -     | -      | -     | -               | -     | -            | -     | -            | -     | -           | -     | -           | -     | -           | -     |
| 48  | methylsulfide                                                 | -        | -     | -      | -     | -               | -     | -            | -     | ++           | -     | -           | -     | -           | -     | -           | -     |
| 55  | alkene fragment                                               | +        | -     | +      | -     | -               | -     | ++           | -     | -            | -     | -           | -     | -           | -     | -           | -     |
| 56  | butene, propenal, acrolein                                    | +        | -     | ++     | -     | ++              | -     | ++           | -     | +            | -     | ++          | -     | +           | -     | +           | -     |
| 57  | alkyl fragment                                                | -        | -     | +      | -     | +               | -     | ++           | -     | -            | -     | -           | -     | -           | -     | -           | -     |
| 58  | acetone, propanal, glyoxal, ...                               | +        | -     | -      | -     | -               | -     | -            | -     | ++           | -     | ++          | -     | ++          | -     | ++          | -     |
| 60  | wood combustion fragment (C2H4O2+), glycolaldehyde            | -        | -     | -      | -     | ++              | -     | ++           | -     | -            | -     | -           | -     | -           | -     | -           | -     |
| 68  | isoprene, furan, pentadiene, ...                              | -        | -     | +      | -     | ++              | -     | ++           | -     | +            | -     | ++          | -     | ++          | -     | ++          | -     |
| 70  | pentene, methylbutene, methacrolein, methyl vinyl ketone, ... | +        | -     | +      | -     | ++              | -     | ++           | -     | +            | -     | ++          | -     | +           | -     | +           | -     |
| 73  | wood combustion fragment (C3H5O2+), butylamine                | -        | -     | -      | -     | ++              | -     | ++           | -     | -            | -     | -           | -     | -           | -     | -           | -     |
| 78  | benzene, ?                                                    | +        | -     | +      | -     | -               | -     | -            | -     | -            | -     | -           | -     | -           | -     | -           | -     |
| 82  | Methylfuran, methylpyrazole, ...                              | -        | -     | +      | -     | ++              | -     | ++           | -     | ++           | -     | ++          | -     | ++          | -     | ++          | -     |
| 83  | ?                                                             | -        | -     | -      | -     | -               | -     | +            | -     | -            | -     | +           | -     | +           | -     | +           | -     |
| 84  | cyclohexane, methylbutenal, hexene, ...                       | -        | -     | +      | -     | -               | -     | +            | -     | +            | -     | -           | -     | -           | -     | -           | -     |
| 86  | hexane, methylbutanal, ...                                    | +        | -     | -      | -     | -               | -     | -            | -     | +            | -     | -           | -     | +           | -     | +           | -     |
| 92  | toluene                                                       | -        | -     | -      | -     | -               | -     | -            | -     | -            | -     | -           | -     | -           | +     | -           | +     |
| 94  | phenol, vinylfuran, methylpyrazine, ...                       | +        | ++    | +      | ++    | +               | +     | +            | ++    | +            | +     | +           | +     | +           | +     | -           | +     |
| 95  | dimethylpyrrole, formylpyrrole, ...                           | -        | -     | -      | -     | -               | -     | ++           | -     | -            | -     | -           | -     | +           | -     | -           | -     |
| 96  | diethylfuran, furfural, dimethylpyrazole, ...                 | -        | -     | +      | -     | +               | -     | ++           | -     | +            | -     | ++          | -     | ++          | -     | ++          | -     |

|     |                                                                                                                     |   |    |   |    |    |    |    |    |    |   |    |    |    |    |
|-----|---------------------------------------------------------------------------------------------------------------------|---|----|---|----|----|----|----|----|----|---|----|----|----|----|
| 98  | methylfuranone, 4-oxo-pent-2-enal, heptene, ...                                                                     | - | -  | + | -  | ++ | -  | ++ | -  | ++ | - | ++ | -  | ++ | -  |
| 100 | heptane, methylhexane, dihydro-furandione, ...                                                                      | - | -  | - | -  | -  | -  | -  | -  | -  | - | ++ | -  | ++ | -  |
| 104 | styrene, malonic acid                                                                                               | + | ++ | - | +  | -  | -  | -  | ++ | -  | - | -  | -  | -  | -  |
| 106 | xylene, benzaldehyde, ethylbenzene, ...                                                                             | - | +  | + | +  | -  | -  | -  | -  | -  | - | -  | -  | +  | +  |
| 108 | anisol, methylphenol, benzylalcohol, ...                                                                            | - | +  | + | +  | -  | +  | -  | +  | +  | + | ++ | ++ | ++ | ++ |
| 110 | methylfurfural, acetylfuran, heptadienal, ...                                                                       | - | -  | + | -  | ++ | ++ | +  | -  | +  | - | ++ | -  | +  | -  |
| 112 | methyl-furandione, ethyl- or dimethyl-furanone, ...                                                                 | + | -  | - | -  | -  | -  | -  | -  | +  | - | -  | -  | +  | -  |
| 114 | octane, methylheptane, dihydro-ethyl-furanone, ...                                                                  | - | -  | - | -  | -  | -  | -  | -  | -  | - | -  | -  | ++ | -  |
| 115 | ?                                                                                                                   | - | -  | - | -  | -  | -  | +  | -  | -  | - | -  | -  | -  | -  |
| 118 | methylstyrene, benzofuran, succinic acid, indane ...                                                                | - | +  | - | ++ | -  | -  | -  | ++ | -  | + | -  | +  | -  | +  |
| 120 | phenylacetaldehyde, 1,3,5-trimethylbenzene, acetophenone, ...                                                       | - | -  | - | -  | -  | -  | -  | -  | -  | - | +  | +  | +  | +  |
| 122 | benzoic acid, hydroxybenzaldehyde, trimethylpyrazine, ...                                                           | + | -  | + | -  | -  | -  | -  | -  | +  | - | +  | +  | ++ | +  |
| 124 | guaiaicol, acetyl-methylfuran, dihydroxymethylbenzene, ...                                                          | - | -  | - | -  | ++ | ++ | +  | -  | +  | - | +  | -  | ++ | -  |
| 125 | ?                                                                                                                   | - | -  | - | -  | -  | -  | -  | -  | -  | - | -  | -  | +  | -  |
| 126 | hydroxymethylfurfural, levoglucosenone, trimethylfuranone, ...                                                      | - | -  | - | -  | ++ | -  | +  | -  | -  | - | -  | -  | +  | -  |
| 128 | naphthalene, 3-acetyldihydro-2(3H)-furanone, ...                                                                    | - | ++ | + | ++ | -  | -  | -  | +  | -  | + | -  | +  | +  | -  |
| 132 | methylbenzofuran, ethylstyrole, methylsuccinic acid, ...                                                            | - | -  | - | -  | -  | -  | +  | ++ | -  | + | -  | ++ | +  | +  |
| 134 | malic acid, dimethylbenzaldehyde, methylacetophenone, ...                                                           | - | -  | - | -  | -  | -  | -  | -  | +  | - | +  | +  | +  | +  |
| 136 | 2-methylerythritol, 2-methylthreitol, methoxybenzaldehyde, toluic acid, tetramethylpyrazine, phenylacetic acid, ... | - | -  | - | -  | -  | -  | -  | -  | +  | - | +  | -  | +  | -  |
| 137 | Nitrotoluene                                                                                                        | - | -  | - | -  | -  | +  | -  | -  | -  | - | -  | -  | -  | -  |
| 138 | methylguaiaicol, hydroxybenzoic acid, acetylfuraldehyde, pinaketone, nopinone ...                                   | - | -  | - | -  | ++ | +  | +  | -  | +  | + | +  | +  | +  | -  |
| 140 | 2,2-Dimethyl-cyclobutyl-1,3-diethanal, Trimethyl-cyclohex-2-en-1-ol                                                 | - | -  | - | -  | -  | -  | -  | -  | -  | - | -  | -  | +  | -  |
| 142 | 2-methylnaphthalene, nonanal, ...                                                                                   | - | +  | - | ++ | -  | -  | -  | -  | -  | - | -  | +  | -  | +  |
| 144 | octanoic acid, phenylfuran, naphthol, ...                                                                           | - | +  | - | ++ | ++ | +  | +  | -  | -  | - | -  | +  | -  | +  |
| 146 | methylpentanedioic acid, hexanedioic acid, methylindanone, ...                                                      | - | -  | + | -  | -  | -  | -  | ++ | -  | + | +  | +  | +  | +  |

|     |                                                                        |   |    |    |    |    |    |   |    |   |   |   |   |    |   |   |   |
|-----|------------------------------------------------------------------------|---|----|----|----|----|----|---|----|---|---|---|---|----|---|---|---|
| 148 | hydroxyglutaric acid, isopropyl-1,2dihydroxybutanol, ...               | - | -  | -  | -  | -  | -  | - | -  | + | - | + | - | +  | - | + | - |
| 150 | vinylguaiaicol, methyl-hydroxy-acetophenone, dimethylbenzoic acid, ... | - | -  | -  | -  | ++ | ++ | + | -  | - | - | - | - | -  | - | + | - |
| 152 | ethylguaiaicol, vanillin, 3-oxo-pina ketone, ...                       | - | -  | -  | -  | ++ | -  | + | -  | - | - | - | - | -  | - | - | - |
| 156 | Dimethylnaphthalene, ...                                               | - | +  | -  | ++ | -  | -  | - | +  | - | + | - | + | -  | + | - | + |
| 157 | ?                                                                      | - | -  | -  | -  | -  | -  | - | -  | - | - | - | - | ++ | - | + | - |
| 158 | nonanoic acid, naphthalenedione, methylnaphthol, ...                   | - | -  | +  | +  | -  | -  | - | +  | - | + | - | + | -  | + | - | + |
| 160 | Heptanedioic acid, methyl-furyl-pyrazine, ...                          | - | -  | -  | -  | -  | -  | - | +  | - | - | + | - | -  | - | - | - |
| 162 | Levoglucozan, nicotine, ...                                            | - | -  | -  | -  | -  | -  | + | -  | - | - | - | - | -  | - | - | - |
| 163 | ?                                                                      | - | -  | -  | -  | -  | -  | - | -  | - | + | - | - | -  | - | - | - |
| 164 | Allylguaiacol, eugenol                                                 | - | -  | -  | -  | ++ | ++ | + | -  | - | - | - | - | +  | - | + | - |
| 166 | propylguaiaicol, benzenedicarboxylic acid, ...                         | - | -  | -  | -  | +  | -  | - | -  | - | - | - | - | -  | - | - | - |
| 168 | vanillic acid, trimethoxybenzene, ...                                  | - | -  | -  | ++ | -  | -  | + | -  | - | - | - | + | -  | + | - | + |
| 169 | 4-isopropenyl-1-methyl-1hydroxy-2-oxocyclohexane, ...                  | - | -  | -  | -  | -  | -  | - | -  | - | - | - | - | +  | - | + | - |
| 170 | decanoic acid, dodecane, ...                                           | - | -  | ++ | +  | -  | -  | - | -  | + | + | - | + | -  | + | - | + |
| 172 | decanoic acid, nonanoic acid methyl ester, ...                         | - | -  | -  | +  | -  | -  | - | -  | - | + | - | + | -  | - | - | + |
| 178 | phenanthrene, anthracene, coniferyl aldehyde...                        | + | ++ | -  | ++ | ++ | ++ | - | +  | - | - | - | - | -  | - | - | + |
| 180 | guaiaicyl acetone, phenalenone, 3,5-dimethoxy-acetophenone, ...        | - | -  | -  | +  | +  | -  | + | +  | - | - | - | - | -  | + | - | + |
| 182 | syringaldehyde, benzophenone, 4-Oxopononaldehyde, ...                  | - | -  | -  | +  | -  | ++ | + | +  | - | - | - | + | +  | + | + | + |
| 190 | ?                                                                      | - | -  | -  | -  | -  | -  | - | -  | - | - | - | + | -  | - | - | - |
| 192 | methylphenanthrene, methylanthracene                                   | - | ++ | -  | ++ | -  | -  | - | -  | - | - | - | - | -  | + | - | - |
| 194 | 4-allyl-2,6-dimethoxyphenol                                            | - | +  | -  | ++ | -  | -  | + | ++ | - | - | - | + | -  | + | - | + |
| 196 | acetosyringone, propylsyringol, methyl homovanillate, ...              | - | -  | -  | -  | -  | -  | + | -  | - | - | - | + | -  | - | - | + |
| 198 | oxo pinonic acid, 2-methyl-4,6-dinitrophenol, ...                      | - | -  | -  | -  | -  | -  | - | -  | - | + | + | - | -  | - | - | - |
| 200 | dibenzofuranol, 10-hydroxypinonic acid, dodecanoic acid                | - | -  | -  | -  | -  | -  | - | -  | - | - | - | - | -  | + | - | - |
| 202 | pyrene, flouranthene, ...                                              | + | ++ | -  | ++ | +  | ++ | - | ++ | - | - | - | - | -  | - | - | - |
| 204 | phenylnaphthalene, ...                                                 | - | -  | -  | -  | -  | -  | - | -  | - | - | - | + | -  | - | - | - |
| 206 | dimethylphenanthrene                                                   | - | -  | -  | ++ | -  | -  | - | +  | + | - | + | + | -  | - | - | - |
| 207 | ?                                                                      | - | -  | -  | -  | -  | -  | - | -  | + | - | + | - | -  | - | - | - |
| 208 | anthracenedione, phenathroquinone                                      | - | -  | -  | +  | -  | -  | - | +  | - | - | - | + | -  | + | - | + |



|     |                                                               |   |    |   |   |   |    |   |   |   |   |   |   |   |   |
|-----|---------------------------------------------------------------|---|----|---|---|---|----|---|---|---|---|---|---|---|---|
| 276 | benzo(ghi)perylene, indeno(1,2,3-cd)pyrene, ...               | + | ++ | - | + | - | ++ | + | + | - | - | - | - | - | - |
| 278 | dibenz[a,h]anthracene                                         | - | +  | - | - | - | +  | - | - | - | - | - | - | - | - |
| 284 | heptadecanoic acid methyl ester, stearic acid, ...            | - | -  | - | - | - | ++ | - | - | - | - | - | - | - | - |
| 296 | heneicosane                                                   | - | -  | + | - | - | -  | - | - | - | - | - | - | - | - |
| 298 | abietatetraenoic acid, octadecanoic acid methyl ester, ...    | - | -  | - | - | + | ++ | - | + | - | - | - | - | - | - |
| 300 | coronene, dehydroabiatic acid                                 | - | ++ | - | - | + | +  | + | + | - | - | - | - | - | - |
| 302 | pimaric acid, abiatic acid                                    | - | ++ | - | - | + | -  | + | - | - | - | - | - | - | - |
| 308 | ?                                                             | - | -  | - | - | - | -  | - | - | - | - | + | - | - | - |
| 310 | ethyl oleate, docosane, ...                                   | - | -  | - | - | - | +  | - | - | - | - | - | - | - | - |
| 312 | methylabietatetraenoate, eicosanoic acid, ethyl stearate, ... | - | -  | - | - | + | ++ | + | + | - | - | - | - | - | - |
| 322 | ?                                                             | - | -  | - | - | - | +  | - | - | - | - | - | - | - | - |
| 324 | Tricosane, docosanal, ...                                     | - | -  | - | - | - | +  | - | - | - | - | - | - | - | - |
| 326 | ?                                                             | - | -  | - | - | - | +  | - | - | - | - | - | - | - | - |
| 340 | docosanoic acid, tricosanol, ...                              | - | -  | - | - | + | -  | + | - | - | - | - | - | - | - |
| 342 | tetramethoxyisoflavone                                        | - | -  | - | - | - | +  | - | - | - | - | - | - | - | - |
| 344 | deoxomatairesinol                                             | - | -  | - | - | + | +  | - | - | - | - | - | - | - | - |
| 368 | tetracosanoic acid                                            | - | -  | - | - | - | -  | - | - | - | - | - | - | - | - |
| 374 | ?                                                             | - | -  | - | - | - | -  | - | + | - | - | - | - | - | - |
| 384 | deisopropyldehydroabiatic acid                                | - | -  | - | - | - | +  | - | - | - | - | - | - | - | - |
| 388 | ?                                                             | - | -  | - | - | - | -  | - | + | - | - | - | - | - | - |
